1 **MCM10 compensates for Myc-induced DNA replication stress in breast cancer stem-like**  
2 **cells**

3

4 Takahiko Murayama<sup>1,2</sup>, Yasuto Takeuchi<sup>2</sup>, Kaoru Yamawaki<sup>3,4</sup>, Toyoaki Natsume<sup>5,13</sup>, Rojas-  
5 Chaverra N. Marcela<sup>2</sup>, Tatsunori Nishimura<sup>2</sup>, Yuta Kogure<sup>6</sup>, Asuka Nakata<sup>2,7</sup>, Kana Tominaga<sup>1,2,3</sup>,  
6 Asako Sasahara<sup>1,8</sup>, Masao Yano<sup>9</sup>, Satoko Ishikawa<sup>10</sup>, Tetsuo Ohta<sup>10</sup>, Kazuhiro Ikeda<sup>11</sup>, Kuniko  
7 Horie-Inoue<sup>11</sup>, Satoshi Inoue<sup>11</sup>, Masahide Seki<sup>12</sup>, Yutaka Suzuki<sup>12</sup>, Sumio Sugano<sup>12</sup>, Takayuki  
8 Enomoto<sup>4</sup>, Masahiko Tanabe<sup>8</sup>, Kei-ichiro Tada<sup>8</sup>, Masato T. Kanemaki<sup>5,13</sup>, Koji Okamoto<sup>3</sup>, Arinobu  
9 Tojo<sup>1</sup>, Noriko Gotoh<sup>1,2\*</sup>

10

11 <sup>1</sup>Division of Molecular Therapy, Institute of Medical Science, The University of Tokyo, Minato-  
12 ku, Tokyo, Japan

13 <sup>2</sup>Division of Cancer Cell Biology, Cancer Research Institute, Kanazawa University, Kanazawa  
14 City, Ishikawa, Japan

15 <sup>3</sup>Division of Cancer Differentiation, National Cancer Center Research Institute, Chuo-ku, Tokyo,  
16 Japan

17 <sup>4</sup>Department of Obstetrics and Gynecology, Graduate School of Medical and Dental Sciences,  
18 Niigata University, Niigata, Japan

19 <sup>5</sup>Department of Chromosome Science, National Institute of Genetics, Research Organization of  
20 Information and Systems (ROIS), Mishima City, Shizuoka, Japan

21 <sup>6</sup>Department of Computational Biology and Medical Sciences, Graduate School of Frontier  
22 Science, The University of Tokyo, Kashiwa City, Chiba, Japan

23 <sup>7</sup>Department of Pediatrics, Faculdade de Medicina, Universidade de São Paulo, São Paulo, Brazil

24 <sup>8</sup>Department of Breast & Endocrine Surgery, Graduate School of Medicine, The University of  
25 Tokyo, Bunkyo-ku, Tokyo, Japan

26 <sup>9</sup>Department of Surgery, Minamimachida Hospital, Machida City, Tokyo, Japan

27 <sup>10</sup>Department of Gastroenterological Surgery, Kanazawa University, Kanazawa City, Ishikawa,  
28 Japan

29 <sup>11</sup>Division of Gene Regulation and Signal Transduction, Research Center for Genomic Medicine,  
30 Saitama Medical University, Hidaka City, Saitama, Japan

31 <sup>12</sup>Department of Medical Genome Sciences, Graduate School of Frontier Sciences, The  
32 University of Tokyo, Kashiwa City, Chiba, Japan

33 <sup>13</sup>Department of Genetics, SOKENDAI, Mishima City, Shizuoka, Japan

34

35 Running title: MCM10 maintains CSCs in c-Myc-induced DNA replication stress

36

37 Corresponding Author:

38 Noriko Gotoh, MD, PhD

39 Email: [ngotoh@staff.kanazawa-u.ac.jp](mailto:ngotoh@staff.kanazawa-u.ac.jp)

40 Phone: +81 762646730

41 Kakuma-machi, Kanazawa City, Ishikawa 920-1192, Japan

42

43 Disclosure of Potential Conflicts of Interest;

44 The authors declare no potential conflicts of interest.

45

46 **Abstract**

47 Cancer stem-like cells (CSCs) are responsible for the drug resistance of tumors and recurrence  
48 while they experience DNA replication stress. However, the underlying mechanisms that cause  
49 DNA replication stress in CSCs and how they compensate for this stress remain unclear. Here we  
50 provide evidence that upregulated c-Myc expression induces stronger DNA replication stress in  
51 patient-derived breast CSCs than in differentiated cancer cells. Our results suggest critical roles  
52 for mini-chromosome maintenance protein 10 (MCM10), which is a firing (activating) factor of  
53 the DNA replication origins, to compensate for the DNA replication stress. Expression levels of  
54 MCM10 are upregulated in CSCs and maintained by c-Myc. c-Myc-dependent collisions may  
55 take place between RNA transcription and DNA replication machinery in nuclei, thereby causing  
56 DNA replication stress. MCM10 may activate dormant replication origins close to the collisions  
57 to ensure replication progression. Moreover, patient-derived breast CSCs were dependent on  
58 MCM10 for their maintenance even after enrichment for CSCs that were resistant to paclitaxel,  
59 the standard chemotherapeutic agent. In addition, MCM10 depletion decreased the growth of  
60 cancer cells but not normal cells. Therefore, MCM10 is likely to robustly compensate for DNA  
61 replication stress and facilitate genome duplication in the S-phase in cancer cells, which is more  
62 pronounced in CSCs. We provide a preclinical rationale to target the c-Myc-MCM10 axis to  
63 prevent drug resistance and recurrence.

64

## 65 **Introduction**

66 Breast cancer is the most frequently observed tumor type among women worldwide. Some breast  
67 cancer patients show poor prognosis due to resistance to therapy and tumor recurrence (Torre et  
68 al., 2015). Over the past few decades, studies have shown that a subset of cancer cells have the  
69 capacity to initiate tumors (Batlle & Clevers, 2017; Saygin, Matei, Majeti, Reizes, & Lathia,  
70 2019). These tumor-initiating cells or cancer stem-like cells (CSCs) are resistant to conventional  
71 chemotherapeutic agents, resulting in recurrence. To improve the prognosis of breast cancer  
72 patients, CSC-targeted therapeutic strategies are urgently required. Clarification of the features of  
73 CSCs is important to develop CSC-targeting therapy to remove the cells and prevent recurrence.  
74 *In vitro* tumor spheroid formation in serum-free floating culture conditions was established to  
75 enrich CSCs (Ablett, Singh, & Clarke, 2012; Ponti et al., 2005). Researchers, including our group,  
76 have used this method to shed light on the features of CSCs (Beier et al., 2007; Clement, Sanchez,  
77 de Tribolet, Radovanovic, & Ruiz i Altaba, 2007; Hinohara et al., 2012; Murayama et al., 2016;  
78 Sansone et al., 2007; Tominaga et al., 2019). Although the features of CSCs have been studied  
79 extensively, the roles of DNA replication initiation factors in CSCs have not been studied carefully.

80 In preparation for cell division, the whole genome must be replicated during the S-phase of the  
81 cell cycle. To rapidly generate a complete copy of the entire genome, replication of the eukaryotic  
82 genome is initiated from thousands of origins (Fragkos, Ganier, Coulombe, & Mechali, 2015;  
83 Masai, Matsumoto, You, Yoshizawa-Sugata, & Oda, 2010). The inactive MCM2–7 helicases  
84 (composed of MCM family proteins MCM2, MCM3, MCM4, MCM5, MCM6, and MCM7) bind  
85 to numerous sites of origins of DNA replication on the genome to form pre-replicative complexes  
86 (pre-RCs) in late M- and G1-phases. Following the activation of S-phase cyclin-dependent kinase  
87 (S-CDK) in the S-phase, MCM2-7 in pre-RCs are activated to form the CDC45/MCM2-7/GINS  
88 (CMG) helicase, and only ~1/10 of the chromatin-bound MCM2-7 are converted into the CMG  
89 helicase in normal cells. Subsequent recruitment of firing (activating) factors including MCM10  
90 activates the CMG helicase to form the replisome that includes DNA polymerases, followed by

91 initiation of bidirectional DNA replication (Douglas, Ali, Costa, & Diffley, 2018; Gambus et al.,  
92 2006; Kanke, Kodama, Takahashi, Nakagawa, & Masukata, 2012; Looke, Maloney, & Bell, 2017;  
93 van Deursen, Sengupta, De Piccoli, Sanchez-Diaz, & Labib, 2012; Watase, Takisawa, &  
94 Kanemaki, 2012). MCM10 opens the MCM2–7 ring within CMG, creating a single-stranded  
95 DNA gate for passing one DNA strand when the CMG helicase engages in fork progression  
96 (Wasserman, Schauer, O'Donnell, & Liu, 2019). On the other hand, most of the origins remain  
97 dormant, and those pre-RCs are passively removed from DNA when the replisomes approach the  
98 dormant origins during replication progression.

99 DNA replication stress is defined as the stalling or slowing of replication progression due to  
100 interference with the normal replication process by a variety of mechanisms, including DNA  
101 strand breaks, lack of nucleotides, etc. (Techer, Koundrioukoff, Nicolas, & Debatisse, 2017;  
102 Zeman & Cimprich, 2014). Recently, a repair process that responds to DNA strand breaks has  
103 received much attention as a potential therapeutic target. Inhibitors of poly (ADP-ribose)  
104 polymerase (PARP), a repair enzyme for single strand breaks, are clinically used in breast cancer  
105 patients with *BRCA* mutations (Pettitt & Lord, 2019). However, in the majority of patients without  
106 *BRCA* mutations, PARP inhibitors are not clearly effective. In cancer cells, constitutive activation  
107 of oncogenes is a primary cause of replication stress (Gaillard, Garcia-Muse, & Aguilera, 2015;  
108 Kotsantis, Petermann, & Boulton, 2018; Petropoulos, Champeris Tsaniras, Taraviras, & Lygerou,  
109 2019). Although it was reported that glioblastoma stem cells suffer from upregulated DNA  
110 replication stress (Carruthers et al., 2018), the level of DNA replication stress in other types of  
111 CSCs, including breast CSCs, remains unknown. When cells suffer from replication stress,  
112 checkpoint pathways are activated (Kotsantis et al., 2018) (Petropoulos et al., 2019) (Blow & Ge,  
113 2009). Ataxia telangiectasia- and Rad 3-related protein (ATR) kinase, and subsequently  
114 checkpoint kinase 1 (Chk1), are phosphorylated and activated. Activated Chk1 slows down cell  
115 cycle progression in the S-phase and creates a time for the dormant origins to be activated for

116 completion of DNA replication. Many proteins included in the aforementioned DNA replication  
117 initiation machinery work together to activate the dormant origins.

118 *c-Myc* is a typical oncogene that is frequently overexpressed in numerous cancer types. The  
119 transcription factor c-Myc is able to induce transcription of ~15% of whole genes in the genome  
120 (Meyer & Penn, 2008). Although transcription in the G1-phase is sequentially followed by DNA  
121 replication in the S-phase in normal cells, c-Myc overexpression disrupts the cooperation between  
122 the transcription and replication machinery (Macheret & Halazonetis, 2018). As a result, they  
123 collide on the DNA strands, leading to DNA replication stress in cancer cells.

124 To clarify the specific features of CSCs in this study, we examined breast cancer patient-derived  
125 primary samples. We compared whole transcriptomes of CSC-enriched spheroid cells and  
126 cultured cells in the regular adherent condition. We found that pathways contributing to c-Myc  
127 activation and DNA replication stress were upregulated in CSC-enriched spheroid cells. Our  
128 results suggest that c-Myc causes frequent collisions between the transcription and replication  
129 machinery in the nuclei. These collisions may be one of the major causes of higher levels of  
130 DNA replication stress in CSCs compared to differentiated cancer cells. Further, we showed that  
131 the expression levels of MCM10 were increased in CSCs and differentiated cancer cells, and that  
132 expression was higher in the former than the latter, compared to normal cells. MCM10 may  
133 compensate for such replication stress by activating the dormant origins. Moreover, we  
134 demonstrated that MCM10 plays critical roles in the maintenance of CSCs, even those that are  
135 resistant to paclitaxel, a commonly used chemotherapeutic agent for breast cancer. Furthermore,  
136 by analyzing patient-derived cancer cells (PDCs), we found that MCM10 is also essential for the  
137 growth of differentiated cancer cells. Thus, inhibition of MCM10 may be a novel therapeutic  
138 strategy that targets replication initiation in CSCs.

139 This study is the first to demonstrate that increased activity of c-Myc is a major cause of DNA  
140 replication stress in breast CSCs. Furthermore, a c-Myc-dependent firing factor, MCM10, which

141 is required for activation of the replisome, is essential for CSCs, probably for compensating for  
142 DNA replication stress.

143

## 144 **Results**

### 145 **CSCs can be enriched in the spheroid culture condition and show distinct features**

146 To identify specific features of CSCs, we first cultured patient-derived breast cancer cells both in  
147 the spheroid condition, in which cells are cultured in sphere culture medium (SCM) on ultra-low  
148 attachment dishes, and in the normal adherent condition (Fig. 1a). Spheroid cells retain their stem  
149 cell features, such as high tumor-initiating ability and expression of stemness marker proteins  
150 (Ablett et al., 2012; Dontu, Al-Hajj, Abdallah, Clarke, & Wicha, 2003; Murayama et al., 2016).  
151 Indeed, patient-derived spheroid cells showed significantly higher tumor-initiating ability *in vivo*  
152 compared to their counterparts in the adherent condition (Fig. 1b and Supplementary Fig. 1a). In  
153 addition, western blotting revealed that the expression levels of the stemness marker proteins  
154 Nanog and Oct-4 were higher in spheroid cells than in adherent cells (Fig. 1c).  
155 Immunocytochemistry (ICC) showed that strong Nanog staining was observed in the nucleus and  
156 that more spheroid cells were strongly positive for Nanog (Fig. 1d). A subpopulation of breast  
157 CSCs is enriched in the CD24<sup>low/-</sup>/CD44<sup>high</sup> cell population (Al-Hajj, Wicha, Benito-Hernandez,  
158 Morrison, & Clarke, 2003), and thus, we investigated this population with flow cytometry. The  
159 proportion of cells in the CD24<sup>low/-</sup>/CD44<sup>high</sup> cell fraction was higher in spheroid cells than in  
160 adherent cells (Fig. 1e). These results indicate that breast CSCs were more abundant in spheroid  
161 cells, whereas differentiated cancer cells were more abundant in adherent cells.

162 Next, we performed RNA sequencing (RNA-seq) to compare the transcriptomes of spheroid  
163 cells and adherent cells (Fig. 1f). All samples were derived from the breast tumor tissues of three  
164 individual patients (PDCs #1, #2, and #3; clinical sample information is summarized in  
165 Supplementary Table 1). Gene set enrichment analysis  
166 (<http://software.broadinstitute.org/gsea/index.jsp>) based on the RNA-seq data revealed that genes

167 associated with drug resistance and the epithelial-mesenchymal transition were upregulated in  
168 spheroid cells compared to adherent cells (Fig. 1g). Because these are well-known features of  
169 CSCs, we confirmed that CSCs were enriched in spheroid cells (Zhang & Weinberg, 2018). We  
170 also noticed that other gene sets related to Myc targets and the DNA replication stress response  
171 were highly upregulated in spheroid cells (Fig. 1g).

172

173 **c-Myc expression is increased in CSC-enriched spheroid cells, which may lead to strong**  
174 **DNA replication stress**

175 We then investigated c-Myc protein levels. Western blotting revealed that expression levels of c-  
176 Myc were higher in spheroid cells than in adherent cells among all three PDC samples irrespective  
177 of the different subtypes (Fig. 1h, triple negative [#1], HER2 [#4], and luminal-like [#6]). ICC  
178 showed strong accumulation of c-Myc in the nucleus, and we observed that more spheroid cells  
179 were strongly positive for c-Myc than adherent cells (Fig. 1i), suggesting that a subpopulation of  
180 CSCs express c-Myc strongly.

181 Because gene sets related to the DNA replication stress response were upregulated in spheroid  
182 cells, we next examined the proteins involved in the checkpoint pathways (Kotsantis et al., 2018;  
183 Petropoulos et al., 2019). We found that the phosphorylation levels and amounts of ATR and Chk1  
184 were higher in spheroid cells than in adherent cells (Fig. 2a). These results suggest that spheroid  
185 cells experienced more DNA replication stress that activated the checkpoint pathways. To directly  
186 monitor DNA replication fork stalling caused by DNA replication stress, we performed DNA  
187 fiber assays (Schwab & Niedzwiedz, 2011). We labeled cells with IdU for 30 min and then with  
188 CIdU for the next 30 min (Fig. 2b). Using this approach, bidirectional forks can be observed when  
189 a single replication origin is activated in the first 30 min (IdU: green) and then proceeds in two  
190 opposite directions (Fig. 2c, left and middle panels). If the two forks proceed normally, a CIdU-  
191 labeled (red) fork of the same length should be observed. On the other hand, when one fork stalls  
192 because of DNA replication stress, the two forks will have different lengths. We observed fork



193 stalling more frequently in spheroid cells as reflected in the higher frequency of asymmetric  
194 CIdU-containing forks (Fig. 2c, right panel). When forks stall during the first 30 min, the stalled  
195 forks will be labeled only by IdU (green) (Fig. 2d, left panel). We observed these stalled forks  
196 more frequently in spheroid cells (Fig. 2d, right panel). Taken together, we concluded that DNA  
197 replication stress is upregulated in CSCs compared to differentiated cancer cells.

198 Upregulation of c-Myc induces collisions between transcription and replication machinery in  
199 the nucleus, leading to DNA replication stress (Macheret & Halazonetis, 2018). We hypothesized  
200 that upregulated c-Myc in CSCs causes collisions between transcription and replication  
201 machinery more frequently than in differentiated cancer cells. The collisions are associated with  
202 stabilized R-loops, that is, an RNA/DNA hybrid and the displaced single-stranded DNA behind  
203 elongation of RNA polymerases (Gan et al., 2011; Techer et al., 2017). R-loops can be detected  
204 with ICC staining with the monoclonal antibody S9.6, which is a widely used tool to recognize  
205 RNA/DNA hybrids (Vijayraghavan, Tsai, & Schwacha, 2016). RNA/DNA hybrid foci detected  
206 with the S9.6 antibody were localized in the nucleus (Fig. 2e). The staining disappeared following  
207 treatment with ribonuclease H (RNaseH), which cleaves RNA strands in the RNA/DNA hybrids,  
208 confirming the specificity of the antibody (Fig. 2e). We found that spheroid cells showed a higher  
209 number of RNA/DNA foci than adherent cells (Fig. 2f). These results suggest that the collisions  
210 between transcription and replication machinery occur more frequently in CSCs than in  
211 differentiated cancer cells.

212 We then depleted c-Myc expression by using small interfering RNAs (siRNAs) for *c-Myc* (Fig.  
213 3a). The depletion of c-Myc led to a decreased number of RNA/DNA hybrid foci and decreased  
214 phosphorylation levels of ATR and Chk1 (Fig. 3b, c). Thus, c-Myc-induced collisions between  
215 transcription and replication machinery in the nuclei likely lead to DNA replication stress, which  
216 is more frequent in CSCs than in differentiated cancer cells.

217

218 **MCM10 expression is upregulated in CSC-enriched spheroid cells and co-localizes with the**

## 219 RNA/DNA hybrid foci in nuclei

220 Based on the results described above, we expected that CSCs would have mechanisms to manage  
221 higher levels of DNA replication stress. We focused our attention on *MCM10*, which was the fifth  
222 most highly upregulated gene (Supplementary Table 2), because MCM10 may activate dormant  
223 origins to compensate for DNA replication stress (Baxley & Bielinsky, 2017). Western blotting  
224 showed that the expression levels of MCM10 were higher in several breast cancer cell lines  
225 compared with MCF10A, a normal mammary epithelial cell line (Fig. 4a). We found that the  
226 expression level of MCM10 was reduced in *c-Myc*-depleted cancer cells, indicating that MCM10  
227 expression is associated with c-Myc expression (Fig. 4b). qPCR and western blotting showed that  
228 expression levels of *MCM10* were higher in spheroid cells compared to adherent cells in several  
229 PDCs and breast cancer cell lines (Fig. 4c,d). In addition, expression of *MCM10* was higher in  
230 the CD24<sup>low/-</sup>/CD44<sup>high</sup> cell population, a subpopulation of CSCs, than in the control population  
231 (Supplementary Fig.1b, c).

232 Further, ICC staining showed that MCM10-positive puncta were present in the nucleus (Fig.  
233 4e). The staining disappeared by depletion of MCM10 by using siRNAs for *MCM10*, confirming  
234 the specificity of the antibodies (Fig. 4e and Fig. 5b). The number of MCM10-positive puncta  
235 were significantly higher in spheroid cells compared to adherent cells (Fig. 4f). All these results  
236 suggest that MCM10 expression is maintained by c-Myc and is upregulated in CSCs.

237 To test whether MCM10 is recruited close to the collisions between the transcription and  
238 replication machinery, we stained PDCs by using the antibodies against MCM10 and S9.6. We  
239 found significant co-localization of MCM10-positive puncta and RNA/DNA hybrid foci (Fig. 4g).  
240 This result supports the notion that MCM10 is recruited to stalled forks due to the collisions in  
241 nuclei. Together, our findings suggest that MCM10 expression is upregulated in both CSCs and  
242 differentiated cancer cells, and that expression is higher in the former than the latter, compared to  
243 normal cells. Expression of MCM10 may be partly induced by upregulated c-Myc expression.  
244 Furthermore, MCM10 may be recruited to stalled forks in nuclei.

245

246 **MCM10 expression levels are prognostic, and MCM10 plays important roles in**  
247 **proliferation of adherent cells**

248 To examine the clinical relevance of MCM10, we analyzed data obtained from publicly available  
249 gene expression profiles of breast cancer tissues (Desmedt et al., 2007; Pawitan et al., 2005). We  
250 found that breast cancer patients with high levels of *MCM10* expression had poor prognosis (Fig.  
251 5a), supporting the possibility that MCM10 plays important roles in tumorigenesis. According to  
252 the Oncomine database (<https://www.oncomine.org>), *MCM10* expression was higher in various  
253 cancer tissues, including breast and colon cancer, than in their normal counterparts  
254 (Supplementary Fig. 2a).

255 To examine the functions of MCM10 in cancer cells, we depleted MCM10 with siRNAs. We  
256 confirmed that two kinds of siRNAs efficiently suppressed expression compared to the control  
257 siRNA (siCtrl) (Fig. 5b,c). We evaluated the effect of these siRNAs on proliferation of adherent  
258 cells. Knockdown of *MCM10* greatly decreased proliferation of MCF7 (luminal), BT20 (triple  
259 negative), and PDC #1 (triple negative) cells relative to a nonspecific control siRNA (siCtrl) (Fig.  
260 5d), indicating that MCM10 is essential for the proliferation of differentiated cancer cells  
261 regardless of breast cancer subtype. To verify the requirement of high expression of MCM10 for  
262 proliferation in ovarian cancer cells, another type of gynecological cancer cell, we utilized the  
263 CRISPR-caspase 9 (Cas9)-mediated conditional knockout system to deplete *MCM10* in patient-  
264 derived ovarian cancer cells (PDC#8) (Fig. 5b right panels and c). We found that doxycycline  
265 (Dox)-induced depletion of *MCM10* led to a great reduction in cell proliferation of the ovarian  
266 cancer cells (Fig.5d). In contrast, knockdown of MCM10 in normal MCF10A cells did not  
267 significantly alter proliferation (Supplementary Fig.2b,c). These results suggest that MCM10  
268 plays important roles in the proliferation of differentiated cancer cells but not normal cells.

269 We next measured DNA replication activity by examining BrdU incorporation. When *MCM10*  
270 was depleted in adherent cells, BrdU incorporation was decreased, indicating that DNA

271 replication activity was significantly decreased in *MCM10*-depleted cells (Fig. 5e). Together,  
272 these results are consistent with the notion that MCM10 depletion increases DNA replication  
273 stress, slows down S-phase progression, and decreases cell proliferation. It appears that MCM10  
274 is a limiting factor for dealing with DNA replication stress to complete S-phase, leading to cell  
275 proliferation.

276 We next examined whether MCM5, a component in pre-RCs, is a limiting factor for  
277 proliferation of cancer cells, to the same extent as MCM10. We depleted MCM5 in MCF7 cells  
278 with siRNAs. However, we found that cell proliferation was not significantly altered  
279 (Supplementary Fig.3a,b). This result indicates that MCM5 is not a limiting factor for  
280 proliferation of cancer cells in this condition. Consistently, a previous report showing that  
281 MCM2–7 is highly abundant and that MCM5-depleted cells do not show a significant growth  
282 defect in normal culture conditions (Ge, Jackson, & Blow, 2007). We then asked whether MCM10  
283 overexpression contributes to dealing with the replication stress and thus promotes cell  
284 proliferation. To test this, we first overexpressed MCM10 and found that cell proliferation was  
285 not significantly altered by MCM10 overexpression alone (Supplementary Fig. 5c,d). We further  
286 treated cells with hydroxyurea (HU), an inhibitor of ribonucleotide reductase, to induce  
287 replication stress. Treatment with HU leads to a shortage of the deoxyribonucleotides that are  
288 used for DNA synthesis in the S-phase (Vesela, Chroma, Turi, & Mistrik, 2017). As expected,  
289 treatment with HU decreased cell proliferation, because cells experienced stronger replication  
290 stress (Supplementary Fig. 5e). We found that the decreased cell proliferation was partly restored  
291 by MCM10 overexpression when cells were treated with 500  $\mu$ M HU. In this condition, we found  
292 that depletion of MCM5 blocked the restored effects on cell proliferation by MCM10  
293 overexpression (Supplementary Fig. 5f). These results suggest that MCM10 overexpression deals  
294 with the HU-induced strong replication stress in cooperation with MCM5.

295

296 **MCM10 plays important roles in CSC properties**

297 Next, we focused on the association between MCM10 upregulation and CSCs. To this end, we  
298 first examined the effects on tumor sphere-forming capacity. *MCM10* depletion greatly decreased  
299 the sphere-forming ability of all tested cancer cells (Fig. 6a). We subsequently examined the  
300 proportion of CD24<sup>low/-</sup>/CD44<sup>high</sup> cells, a subpopulation of the breast CSCs. The proportion of  
301 CD24<sup>low/-</sup>/CD44<sup>high</sup> cells was lower in *MCM10*-depleted cells than in control cells (Fig. 6b).  
302 Furthermore, the expression levels of Nanog and Oct-4 were lower in *MCM10*-depleted cells than  
303 in control cells (Fig. 6c). These results suggest that MCM10 plays an important role in the  
304 maintenance of CSCs.

305 We next constructed short hairpin RNAs (shRNAs) against *MCM10* (shMCM10 #1 and #2)  
306 and confirmed that these constructs significantly decreased the levels of MCM10 at both the RNA  
307 and protein levels relative to the control (shCtrl) (Fig. 6d, e). An *in vitro* limiting dilution assay  
308 revealed that *MCM10* depletion with shRNA decreased the tumor sphere-forming ability and  
309 estimated CSC frequency (Supplementary Fig. 3g). We then examined the tumor-initiating  
310 capacity using a patient-derived xenograft model. Using the *in vivo* limiting dilution assay, we  
311 found that *MCM10*-depleted cells had greatly reduced tumor-initiating ability and estimated CSC  
312 frequency (Fig. 6f). The tumor growth rate following inoculation of 10<sup>5</sup> cells was also decreased  
313 by *MCM10* depletion (Fig. 6g, h). Together, these results illustrate the importance of MCM10 in  
314 the maintenance of CSCs *in vitro* and *in vivo*.

315

### 316 **Expression of c-Myc and MCM10 is enriched in paclitaxel-resistant CSCs that are** 317 **dependent on MCM10 for their maintenance**

318 Finally, we examined the possibility that *MCM10* depletion can eradicate CSCs. CSCs are  
319 enriched after paclitaxel treatment, as only differentiated cancer cells are efficiently killed by this  
320 chemotherapeutic drug (Y. Li, Atkinson, & Zhang, 2017; Samanta, Gilkes, Chaturvedi, Xiang, &  
321 Semenza, 2014). Indeed, when we treated cells with paclitaxel, the remaining resistant cells  
322 showed significantly higher sphere-forming abilities (Fig. 7a, b). In addition, we found that the

323 expression levels of MCM10, c-Myc, and Nanog were enriched after treatment (Fig. 7c). However,  
324 when *MCM10* was depleted, the paclitaxel-resistant cells displayed a great reduction in sphere-  
325 forming abilities, and the enrichment of CSCs with high Nanog and c-Myc expression was  
326 abrogated (Fig. 7c, d). These results are consistent with the notion that CSCs that are resistant to  
327 paclitaxel can be eradicated by depletion of *MCM10*.

328 Taken together, our findings suggest that upregulated c-Myc increases RNA transcription in  
329 CSCs (Fig. 7e). The increased RNA transcription may result in collisions between transcription  
330 and replication machinery, thereby causing DNA replication stress, which is more frequent in  
331 CSCs than in differentiated cancer cells. Then, MCM10 may activate the dormant origins near  
332 the stalled replication forks. Upregulated MCM10 by c-Myc may robustly compensate for DNA  
333 replication stress by activating the dormant origins. Therefore, MCM10 is essential for the  
334 proliferation of cancer cells and maintenance of CSCs that are resistant to paclitaxel.

335

### 336 **Discussion**

337 In this study, we provide evidence that a component of the DNA replication initiation machinery,  
338 MCM10, is essential for maintaining CSCs, probably by helping them compensate for DNA  
339 replication stress. MCM10 expression is upregulated in many types of cancer cells (Cui, Hu, Ning,  
340 Tan, & Tang, 2018; W. M. Li et al., 2016; Mahadevappa et al., 2018). Although previous studies  
341 reported that MCM10 upregulation is correlated with tumor malignancy, the molecular  
342 mechanisms remain largely unclear. We have provided mechanistic insight into how MCM10 is  
343 required in cancer cells, including CSCs. MCM10 is likely to efficiently activate dormant origins  
344 to compensate for DNA replication stress, which is more frequent in CSCs than in differentiated  
345 cancer cells. In contrast, the fact that depletion of MCM10 did not significantly alter cell  
346 proliferation in normal cells indicates that a small amount of MCM10 is sufficient for DNA  
347 replication in normal cells. In cancer cells, an increased amount of MCM10 appears to be required  
348 to compensate for the increased DNA replication stress. Targeting MCM10 will likely be effective

349 for eliminating cancer cells, including CSCs, without adverse effects on normal cells.

350 We also show evidence that the replication stress in breast cancer cells and CSCs may be caused  
351 by collisions between the transcription and replication machinery. In neural progenitor cells and  
352 glioblastoma CSCs, transcription of long neural genes increases the frequency of collisions  
353 between the transcription and replication machinery, leading to a higher level of DNA replication  
354 stress (Carruthers et al., 2018). On the other hand, in breast CSCs, it appears that upregulated c-  
355 Myc induces the collisions between the transcription and replication machinery. Emerging  
356 evidence indicates that CSCs are maintained by unique mechanisms that may endow them with a  
357 stress-resistant phenotype relative to differentiated cancer cells. CSCs may need to produce a  
358 higher amount of proteins than differentiated cancer cells to keep their properties, possibly  
359 explaining why CSCs upregulate c-Myc expression. A better understanding of the more detailed  
360 mechanisms of replication stress in CSCs will facilitate the development of therapeutic strategies  
361 targeting CSCs.

362 MCM10 was the most highly upregulated gene among the DNA replication initiation factors  
363 in spheroid cells compared to adherent cells. We found that other MCMs in the pre-RCs were also  
364 among the top 100 upregulated genes. MCM5 was the 43rd most highly upregulated gene and the  
365 second most highly upregulated MCM family gene. However, MCM5 depletion did not  
366 significantly affect cell proliferation with or without treatment with HU (Supplementary Figure  
367 3b, f) (Woodward et al., 2006). Thus, MCM10 but not MCM5 is likely essential for cancer cell  
368 proliferation. In fact, MCM2-7 helicase complexes are expressed abundantly, and cancer cells can  
369 survive after depletion of these molecules for some time (Ge et al., 2007). MCM5 remains in the  
370 pre-RCs in the licensed or dormant origins, whereas MCM10 is recruited as a firing factor to  
371 activate the origins. This functional difference between these MCMs may explain the respective  
372 phenotypes in cancer cells after knockdown of each molecule. GINS and CDC45, other firing  
373 factors, were the 12<sup>th</sup> and 19<sup>th</sup> most highly upregulated genes, respectively, and their roles in CSCs  
374 remain unknown. We are interested in analyzing their roles in a future project.

375 We provide a proof-of-principle that molecules that inhibit functions of MCM10 will be useful  
376 for targeting not only cancer cells but also CSCs. Suramin, an anti-parasitic agent, inhibits  
377 functions of MCM10 (Paulson et al., 2019). Development of inhibitors of MCM10 without  
378 enzymatic activity using Proteolysis Targeting Chimera (PROTAC) technology may be possible  
379 (An & Fu, 2018). Furthermore, the combination of such MCM10 inhibitors with  
380 chemotherapeutic reagents that induce DNA replication stress is expected to synergistically target  
381 cancer cells.  
382



## 383 **Materials and Methods**

### 384 **Cell lines and cell culture**

385 Breast cancer cell lines MCF7, BT20 and BTB474 were purchased from the American Type  
386 Culture Collection (ATCC). Cells were cultured in RPMI1640 (GIBCO, Waltham, MA)  
387 supplemented with 10% fetal bovine serum (FBS; GIBCO) and 1% penicillin–streptomycin (P/S;  
388 Nacalai tesque, Inc., Kyoto, Japan). HEK293T cells (ATCC) were cultured for virus production  
389 in Dulbecco’s Modified Eagle Medium: Nutrient Mixture (DMEM) (GIBCO) supplemented with  
390 10% FBS and 1% P/S. The cells were maintained in a humidified incubator with 5% CO<sub>2</sub> at 37°C.  
391 They are routinely tested for contamination of mycoplasma by using PCR Micoplasma Test Kit  
392 (Takara Bio Inc., Shiga, Japan) and confirmed to be negative before performing experiments.

393

### 394 **Primary Cell Culture**

395 To isolate lineage-negative (Lin<sup>-</sup>) breast cancer cells, cells obtained from breast tumor specimens  
396 were incubated with a mixture of biotin-conjugated antibodies against Lin<sup>+</sup> cells, as previously  
397 described (Tominaga et al., 2019). The antibody mixture included a magnetic cell separation  
398 (MACS) lineage kit for depletion of hematopoietic and erythrocyte precursor cells (CD2, CD3,  
399 CD11b, CD14, CD15, CD16, CD19, CD56, CD123, and CD235a; Miltenyi Biotec, Birgisch  
400 Gladbach, Germany), endothelial cells (CD31, eBioscience, San Diego, CA), and stromal cells  
401 (CD140b, Biolegend, San Diego, CA). After incubation, cells were separated using the MACS  
402 system (Miltenyi Biotec). Isolated Lin<sup>-</sup> breast cancer cells were cultured in Human EpiCult™-B  
403 Medium Kit medium (Stem Cell Technologies, Vancouver, Canada) containing a supplement mix,  
404 freshly prepared 0.48 µg/ml hydrocortisone (Stem Cell Technologies), 2 mM L-glutamine  
405 (Nacalai Tesque), 100 units/ml penicillin (Nakarai tesque, Inc.), and 100 µg/ml streptomycin  
406 (Nakarai tesque, Inc.). Isolated single cells were cultured in a humidified atmosphere at 37°C in  
407 5% CO<sub>2</sub>, and the culture medium was changed every 2 days.

408 Tumor spheres were cultured as follows. Single-cell suspensions were cultured in ultra-low

409 attachment plates and cells were grown in SCM, which consists of DMEM/F-12 (GIBCO),  
410 20 ng/mL epidermal growth factor (Millipore, Burlington, MA), 20 ng/mL basic fibroblast  
411 growth factor (PeproTech, Cranbury, NJ), B27 supplement (GIBCO), and 2 µg/mL heparin  
412 (Stem Cell Technologies), as previously described (Tominaga et al., 2019). Adherent cells  
413 attached to regular cell culture plates were cultured in RPMI1640 (GIBCO) supplemented with  
414 10% FBS (GIBCO) and 1% P/S (Nacalai Tesque Inc.). Patient-derived ovarian cancer spheroid  
415 cells (OVN62) were established from clinical specimens by the procedures as previously  
416 reported (Ishiguro et al., 2016).

417

#### 418 **Tumor sphere formation assay**

419 We previously confirmed that patient-derived breast cancer cells plated at 5,000 cells/mL  
420 yield tumor spheres clonally derived from single cells (Hinohara et al., 2012). Hence, cells  
421 were plated as single-cell suspensions on ultra-low-attachment 24-well plates (1000–5000  
422 cells/well) to obtain single cell-derived tumor spheres. The cells were grown in SCM.  
423 Spheres with diameter >75 µm were counted after 4–7 days.

424

#### 425 **Generation of ovarian cancer spheroid cells with inducible-CRISPR/Cas9 targeting *MCM10***

426 Inducible-Cas9 lentiviral plasmid (Edit-R Inducible lentiviral Cas9; CAS11229) were purchased  
427 from Horizon Discovery (Cambridge, UK). For production of lentivirus encoding inducible-Cas9  
428 nuclease, the lentiviral plasmids and packaging plasmids were transfected into lentiX-293T cells  
429 using Lipofectamine 2000 (Invitrogen, Carlsbad, CA) and lentivirus-containing supernatants  
430 were harvested after 3 days. The lentivirus-containing media was transferred onto OVN62 cells  
431 (Ovarian cancer spheroid cells) to generate cells expressing inducible-Cas9 and incubated with  
432 blasticidin (5 µg/mL) (Nakarai tesque, Inc.) for 3 days. After selection, OVN62 cells  
433 heterogeneously expressing inducible-Cas9 were performed single-cell sorting using a FACS Aria  
434 III Cell Sorter (BD Bioscience, San Jose, CA) to pick up stably expressing inducible-Cas9

435 construct.

436 We performed a modification of pLenti-sgRNA plasmid (Addgene #71409) with the sgRNA  
437 scaffold with the sgRNA sequence targeting *MCM10* (MCM10 sgRNA #1: 5'-  
438 CGGTGAATCTTATACAGAAG-3', MCM10 sgRNA #2: 5'-GAGGGTGGCTCGAACACCAA-  
439 3', MCM10 sgRNA #3: 5'-CGGTGAATCTTATACAGAAG-3' and 5'-  
440 GAGGGTGGCTCGAACACCAA-3'). OVN62 with stably expressing inducible-Cas9 and  
441 targeting *MCM10* were selected by puromycin selection (2 µg/mL) (Nacalai tesque, Inc.).

442

#### 443 **Cell viability assay for ovarian cancer spheroid cells**

444 OVN62 cells stably expressing inducible-Cas9 nuclease and *MCM10*-targeting sgRNA (Non-  
445 target sgRNA, MCM10 sgRNA #1, and #2) were treated with Doxycycline (Dox) (Nacalai tesque,  
446 Inc.) for 3 days to express Cas9 and induce *MCM10* knockout. After DOX treatment, cells were  
447 dissociated to single cells and seeded 3000 cells in each well of the 96-well plates. After 0, 3, 7  
448 days incubation, cell viability was measured by using CellTiter-Glo Assay (Promega, Madison,  
449 WI).

450

#### 451 **RNA extraction, cDNA amplification, library preparation, and sequencing**

452 Total RNA was extracted from cells using the NucleoSpin RNA XS kit (Clontech, Mountain View,  
453 CA). The Smarter Ultra low RNA input kit (Clontech) was used for the synthesis and  
454 amplification of cDNA using up to 10 ng of total RNA following the manufacturer's instructions  
455 and performing no more than 12 cycles of PCR in order to minimize amplification biases. The  
456 quality of cDNA was verified by Agilent 2100 Bioanalyzer using High Sensitivity DNA Chips  
457 (Agilent Technologies, Santa Clara, CA). Truseq DNA Illumina libraries were prepared and  
458 sequenced to obtain approximately 90 million reads (101 bp paired-end reads) per library using  
459 the Hiseq 2000/2500 Illumina sequencer (San Diego, CA).

460

461 **RNA-sequence data analysis**

462 Sequences were trimmed to remove adaptors and low-quality bases. Trimmed reads were mapped  
463 onto the hg19 genome (UCSC human genome 19, version:20150519) using Tophat 2.0.10 and  
464 transcripts were assembled by Cufflinks 2.1.1 based on RefSeq gene annotation. Transcript  
465 expression levels were quantified by Cuffdiff 2.1.1 using the fragments per kilobase of transcript  
466 per million mapped fragments (FPKM) method.

467 GEO accession number is GSE127264.

468

469 **Real-time PCR analysis**

470 Total RNAs were extracted using TRIzol Reagent (Thermo Fisher Scientific, Waltham, MA)  
471 according to the manufacturer's instructions. The High-Capacity cDNA Reverse Transcription  
472 Kit (Thermo Fisher Scientific) was used to prepare the cDNA solution. For real-time PCR  
473 analyses, Taqman probes of *RPF1*, *LTV1*, *ESF1*, *NSA2*, *BRIX1*, *FCF1*, *MCM10* and *Nanog* were  
474 purchased from Applied Biosystems. For detecting premature RNA, primer sequences designed  
475 by Kofuji et al. (Kofuji et al., 2019) (pre-rRNA F; 5'-TGTCAGGCGTTCTCGTCTC-3', pre-  
476 rRNA R; 5'-AGCACGACGTCACCACATC-3') were used. Reactions were performed using the  
477 pre-set program of the ABI ViiA 7 Real-Time PCR System (Thermo Fisher Scientific).

478

479 **siRNA**

480 We purchased two different siRNA duplexes of *MCM10* (#1, HSS124480 and #2, HSS124482),  
481 two different siRNA duplexes of *Myc* (#1, VHS40785 and #2, VHS40789) and a nonspecific  
482 control siRNA duplex with similar GC content (siCtrl; Medium GC Duplex #2) from Invitrogen.  
483 siRNAs against *MCM5* were designed according to a previous report (Ge et al., 2007); target  
484 sequences were 5'-GGAGGUAGCUGAUGAGGUGTT-3' (#1) and 5'-  
485 AAGCAGUCGCAGUGAAGAUUG-3' (#2). siRNAs were transfected using RNAiMAX  
486 (Invitrogen).

487

#### 488 **Transient overexpression of MCM10**

489 Cells were transfected with pCMV6-Myc-DDK-MCM10 (OriGene, Rockville, MD) and control  
490 vector using ViaFect Transfection Reagent (Promega, Madison, WI).

491

#### 492 **Western blot analysis**

493 Immunoblotting was performed using standard procedures as described (Hinohara et al., 2012).  
494 Antibodies against Nanog (4903S), Oct-4 (2750S), ATR (2790S), p-ATR (2853S), Chk1 (2360T),  
495 p-Chk1 (2349T), c-Myc (5605S) and Myc-tag (2278) were purchased from Cell Signaling  
496 Technology (Danvers, MA). Antibodies against MCM10 (3733) and MCM5 (17967) were  
497 purchased from Abcam (Cambridge, UK). Anti-actin antibody (MAB150) was purchased from  
498 Millipore. Cas9 antibody was purchased from Active Motif. Proteins were detected with  
499 horseradish peroxidase–conjugated anti-mouse or anti-rabbit antibodies (GE Healthcare Life  
500 Sciences, Marlborough, MA).

501

#### 502 **Immunocytochemistry**

503 Cells in adherent and sphere culture condition were plated on BioCoat Culture Slide (Corning,  
504 Corning, NY) after trypsinization, and incubated for 6 h. To detect expression of proteins, cells  
505 were fixed with 4% paraformaldehyde (PFA) (Wako, Osaka, Japan) or 100% methanol (Wako,  
506 Osaka, Japan), 6 h after seeding, the shortest period for cell attachment. Cells were incubated with  
507 0.2% Triton X-100 (Wako, Osaka, Japan) to permeabilize membranes, and stained overnight with  
508 primary antibodies and for 1 h with secondary antibodies. Immunofluorescent visualization of  
509 Nuclei was counterstained with DAPI (Thermo Fisher Scientific). Coverslips were mounted with  
510 Fluorescence Mounting Medium (Dako, Glostrup, Denmark). Immunofluorescence was detected  
511 using an Olympus IXplore pro microscope (Tokyo, Japan) or Nikon confocal microscopy (A1  
512 HD25) (Tokyo, Japan) with the ANDOR software. Acquired images were analyzed by ImageJ

513 software. Antibodies against Nanog (4903S) and c-Myc (5605S) were purchased from Cell  
514 Signaling Technology. MCM10 antibody was purchased from Invitrogen (PA5-67218). S9.6  
515 antibody that binds to RNA/DNA hybrid was purchased from Millipore (MABE1095).

516

#### 517 **RNaseH treatment**

518 Cells were incubated with Ribonuclease H RNaseH (60 U/ $\mu$ l) (Takara Bio Inc., Code No. 2150A)  
519 for 4 hours before immunocytochemistry assay.

520

#### 521 **Proliferation assay for breast cancer cells**

522 Cells were seeded in 12-well plates at low density (5000–10000 cells/well), cultured in  
523 RPMI1640 supplemented with 10% FBS and 1% P/S or DMEM with 10% FBS and 1% P/S. HU  
524 (Wako, Tokyo, Japan) was added to the medium as necessary. After 4–6 days, cells were harvested  
525 and counted.

526

#### 527 **Flow cytometry analysis**

528 To identify the breast CSC population, cells were stained with Alexa Fluor 647–conjugated anti–  
529 human CD24 and APC-H7 labeled anti–human CD44 antibodies (BD Pharmingen, San Jose, CA)  
530 at 4°C for 20 min. The cells were then analyzed with a FACS Aria II flow cytometer (BD  
531 Bioscience, San Jose, CA). Dead cells were excluded by propidium iodide (PI; Sigma, St. Luis,  
532 MO) staining. Data were analyzed using the FlowJo software (TreeStar, San Carlos, CA).

533 To detect DNA-binding MCM3, collected cells were first treated with 750  $\mu$ L low-salt  
534 extraction buffer (0.1% Igepal CA-630, 10 mM NaCl, 5 mM MgCl<sub>2</sub>, 0.1 mM PMSF, 10 mM  
535 potassium phosphate buffer [pH 7.4]) for 5 min on ice. Then, the cells were fixed by adding 250  
536  $\mu$ L 10% formalin (SIGMA). After incubation at 4°C for 1 h, the cells were washed with phosphate  
537 buffered saline (PBS)(GIBCO). Extracted cells were then incubated with anti-MCM3 antibody  
538 (Abcam) and anti–rabbit IgG secondary antibody (Alexa Fluor 488) (Molecular Probes, Eugene,

539 OR) in flow buffer (0.1% Igepal CA-630, 6.5 mM Na<sub>2</sub>HPO<sub>4</sub>, 1.5 mM KH<sub>2</sub>PO<sub>4</sub>, 2.7 mM KCl, 137  
540 mM NaCl, 0.5 mM EDTA [pH 7.5]). Cells were analyzed on a FACS Aria II flow cytometer (BD  
541 Bioscience) after staining with Hoechst 33258 (Sigma) to detect nuclear DNA (1 µg/mL).

542

#### 543 **DNA fiber assay**

544 Adherent and sphere-cultured cells were pulsed-labeled with 25 µM IdU (Sigma) for 30 min,  
545 followed by 250 µM CldU (Sigma) for 30 min. The cells were trypsinized and resuspended in  
546 100 µL PBS (GIBCO)(10<sup>5</sup>–10<sup>6</sup> cells/mL). Then, a 2 µL cell suspension was placed at the end of  
547 a glass slide. After air drying for 8 min, 7 µL of fiber lysis solution (50 mM EDTA, 0.5% SDS,  
548 200 mM Tris-HCl [pH 7.5]) was pipetted on top of the cell suspension and mixed. Cell lysis  
549 proceeded for 5 min, and then the slides were tilted at 15° to allow the DNA spread down the  
550 slide. Slides were air-dried for 15 min and fixed in methanol/acetic acid (3:1). After washing with  
551 distilled water, DNA was denatured in 2.5 M HCl for 80 min. The slides were washed with PBS  
552 three times, and blocked for 1 h in 5% bovine serum albumin (BSA) (Sigma) in PBS (GIBCO).  
553 After blocking, the slides were incubated with primary antibodies (anti-CldU, Abcam ab6326;  
554 anti-IdU, BD 347580) followed by secondary antibodies (Alexa Fluor 594–conjugated anti–rat  
555 IgG and Alexa Fluor 488–conjugated anti–mouse IgG)(Molecular Probes).

556

#### 557 **Plasmid construction**

558 The pLKO shRNA vector was used for knockdown experiments. Target sequences for human  
559 *MCM10* were 5'-TCATCCTCAGAAGGTCTTAAT-3' (#1) and 5'-  
560 GGACTTAACAGATGAAGAAGA-3' (#2). Lentiviral plasmids were transduced into HET293T  
561 cells along with ViraPower Lentiviral Packaging Mix (Invitrogen) using the Lipofectamine 3000  
562 Transfection Reagent (Invitrogen). The medium was changed after 16 h.

563

#### 564 **Transduction of patient-derived cancer cells with lentiviral vectors**

565 Culture supernatant from HEK293T cells containing virus particles was applied to patient-derived  
566 cancer cells. The cells were incubated at 37°C in 5% CO<sub>2</sub> for 48 h, and then virus-infected cells  
567 were selected using 2.5 µg/mL puromycin for breast cancer cells and 2 µg/mL puromycin (Nakarai  
568 tesque, Inc.) for ovarian cancer spheroid cells.

569

#### 570 ***In vivo* limiting dilution assay**

571 Seven-week-old female immunodeficient NSG mice were anesthetized with isoflurane (Abbott,  
572 Lake Bluff, IL). Patient-derived breast cancer cells infected with lentivirus (shMCM10 #1, #2,  
573 and shCtrl), or cells cultured in adherent and sphere condition were suspended in 50 µL Matrigel  
574 (BD Biosciences) in a dilution series (10<sup>3</sup>, 10<sup>4</sup>, and 10<sup>5</sup> cells). Suspended samples were then  
575 injected subcutaneously into the mammary fat pads of NSG mice. Tumor volume was measured  
576 twice a week using the following formula:  $V = 1/2(L \times W^2)$ , where  $L$  equals length and  $W$  equals  
577 width. Tumors larger than 50 mm<sup>3</sup> were counted.

578

#### 579 **Statistical analysis**

580 All data are presented as means ± SEM or means ± SD. The unpaired Student *t*-test was used to  
581 compare differences between two samples, and values of  $p < 0.01$ – $0.05$  (\*),  $p < 0.001$ – $0.01$  (\*\*),  
582 or  $p < 0.001$  (\*\*\*) were considered significant. Tumor-initiating frequency was calculated using  
583 the ELDA Software. Kaplan-Meier survival curves were analyzed by log-rank test.

584

#### 585 **Study approval**

586 All human breast carcinoma specimens were obtained from The University of Tokyo Hospital,  
587 Minami-Machida Hospital and Kanazawa University Hospital. Human ovarian cancer specimens  
588 were obtained from Niigata University Medical & Dental Hospital. This study was approved by  
589 the institutional review boards of the Institute of Medical Science, The University of Tokyo; The  
590 University of Tokyo Hospital; Minami Machida Hospital; National Cancer Center; Niigata



591 University; and Kanazawa University. Written informed consent was received from all  
592 participants before inclusion in the study.

593

594

### 595 **Acknowledgements**

596 We thank H. Nakauchi, Y. Ishii, and A. Fujita for their help with flow cytometry. This work  
597 was supported in part by an Extramural Collaborative Research Grant from the Cancer  
598 Research Institute, Kanazawa University, a Research Grant from Princess Takamatsu Cancer  
599 Research Fund (17-2924), a Grant-in-Aid for Scientific Research from JSPS (17K19587 and  
600 18H02679), and a research grant from AMED Project for Development of Innovative  
601 Research on Cancer Therapeutics, Project for Cancer Research and Therapeutic Evolution  
602 (16cm0106120h0001) and Practical Research for Innovative Cancer Control  
603 (16ck0106194h0001) to N.G. This work was also supported by MEXT KAKENHI (No.  
604 221S0002) to N.G. This work was supported by the Graduate Program for Leaders in Life  
605 Innovation (GPLLI) at The University of Tokyo Life Innovation Leading Graduate School (to  
606 T.M., <http://square.umin.ac.jp/gplli/en/index.html>) and a Grant-in-Aid for a Japan Society for  
607 Promotion of Science (JSPS) fellowship (to T.M., <http://www.jsps.go.jp/english/e-pd/index.html>).

608

### 609 **Author contributions**

610 T.M. performed experiments, analyzed and interpreted data and wrote the manuscript. Y.T., K.Y.,  
611 NM.RC., T. Nishimura, Y.K., A.N., K.T. and A.S. performed experiments and analyzed data. T.  
612 Natsume and M.T.K. helped fiber assay, analyzed data and provided scientific insight. M.T.K.  
613 also wrote the manuscript. M.Y., S.I, M.I., T.O., T.E., M.T. and K.T. provided clinical samples.  
614 K.I., K.H-I., S.I. and K.O. analyzed data and provided scientific insight. M.S. and Y.S. performed  
615 RNA sequencing and analyzed data. S.S. and A.T. provided scientific insight and supervised the  
616 study. N.G. conceived the study, analyzed and interpreted data and wrote the manuscript. All

617 authors read the manuscript and provided feedback on the manuscript.

618

## 619 References

- 620 Ablett, M. P., Singh, J. K., & Clarke, R. B. (2012). Stem cells in breast tumours: are they ready for the  
621 clinic? *Eur J Cancer*, *48*(14), 2104–2116. doi:10.1016/j.ejca.2012.03.019
- 622 Al-Hajj, M., Wicha, M. S., Benito-Hernandez, A., Morrison, S. J., & Clarke, M. F. (2003). Prospective  
623 identification of tumorigenic breast cancer cells. *Proc Natl Acad Sci USA*, *100*(7), 3983–3988.  
624 doi:10.1073/pnas.0530291100
- 625 An, S., & Fu, L. (2018). Small-molecule PROTACs: An emerging and promising approach for the  
626 development of targeted therapy drugs. *EBioMedicine*, *36*, 553–562.  
627 doi:10.1016/j.ebiom.2018.09.005
- 628 Batlle, E., & Clevers, H. (2017). Cancer stem cells revisited. *Nat Med*, *23*(10), 1124–1134.  
629 doi:10.1038/nm.4409
- 630 Baxley, R. M., & Bielinsky, A. K. (2017). Mcm10: A Dynamic Scaffold at Eukaryotic Replication Forks.  
631 *Genes (Basel)*, *8*(2). doi:10.3390/genes8020073
- 632 Beier, D., Hau, P., Proescholdt, M., Lohmeier, A., Wischhusen, J., Oefner, P. J., . . . Beier, C. P. (2007).  
633 CD133(+) and CD133(-) glioblastoma-derived cancer stem cells show differential growth  
634 characteristics and molecular profiles. *Cancer Res*, *67*(9), 4010–4015. doi:10.1158/0008-  
635 5472.CAN-06-4180
- 636 Blow, J. J., & Ge, X. Q. (2009). A model for DNA replication showing how dormant origins safeguard  
637 against replication fork failure. *EMBO Rep*, *10*(4), 406–412. doi:10.1038/embor.2009.5
- 638 Carruthers, R. D., Ahmed, S. U., Ramachandran, S., Strathdee, K., Kurian, K. M., Hedley, A., . . .  
639 Chalmers, A. J. (2018). Replication Stress Drives Constitutive Activation of the DNA Damage  
640 Response and Radioresistance in Glioblastoma Stem-like Cells. *Cancer Res*, *78*(17), 5060–  
641 5071. doi:10.1158/0008-5472.CAN-18-0569
- 642 Clement, V., Sanchez, P., de Tribolet, N., Radovanovic, I., & Ruiz i Altaba, A. (2007). HEDGEHOG-GLI1  
643 signaling regulates human glioma growth, cancer stem cell self-renewal, and tumorigenicity.  
644 *Curr Biol*, *17*(2), 165–172. doi:10.1016/j.cub.2006.11.033
- 645 Cui, F., Hu, J., Ning, S., Tan, J., & Tang, H. (2018). Overexpression of MCM10 promotes cell proliferation  
646 and predicts poor prognosis in prostate cancer. *Prostate*. doi:10.1002/pros.23703
- 647 Desmedt, C., Piette, F., Loi, S., Wang, Y., Lallemand, F., Haibe-Kains, B., . . . Consortium, T. (2007).  
648 Strong time dependence of the 76-gene prognostic signature for node-negative breast cancer  
649 patients in the TRANSBIG multicenter independent validation series. *Clin Cancer Res*, *13*(11),  
650 3207–3214. doi:10.1158/1078-0432.CCR-06-2765
- 651 Dontu, G., Al-Hajj, M., Abdallah, W. M., Clarke, M. F., & Wicha, M. S. (2003). Stem cells in normal  
652 breast development and breast cancer. *Cell Prolif*, *36 Suppl 1*, 59–72. Retrieved from  
653 <https://www.ncbi.nlm.nih.gov/pubmed/14521516>
- 654 Douglas, M. E., Ali, F. A., Costa, A., & Diffley, J. F. X. (2018). The mechanism of eukaryotic CMG  
655 helicase activation. *Nature*, *555*(7695), 265–268. doi:10.1038/nature25787
- 656 Fragkos, M., Ganier, O., Coulombe, P., & Mechali, M. (2015). DNA replication origin activation in space  
657 and time. *Nat Rev Mol Cell Biol*, *16*(6), 360–374. doi:10.1038/nrm4002
- 658 Gaillard, H., Garcia-Muse, T., & Aguilera, A. (2015). Replication stress and cancer. *Nat Rev Cancer*,  
659 *15*(5), 276–289. doi:10.1038/nrc3916
- 660 Gambus, A., Jones, R. C., Sanchez-Diaz, A., Kanemaki, M., van Deursen, F., Edmondson, R. D., & Labib,  
661 K. (2006). GINS maintains association of Cdc45 with MCM in replisome progression

- 662 complexes at eukaryotic DNA replication forks. *Nat Cell Biol*, 8(4), 358–366.  
663 doi:10.1038/ncb1382
- 664 Gan, W., Guan, Z., Liu, J., Gui, T., Shen, K., Manley, J. L., & Li, X. (2011). R-loop-mediated genomic  
665 instability is caused by impairment of replication fork progression. *Genes Dev*, 25(19), 2041–  
666 2056. doi:10.1101/gad.17010011
- 667 Ge, X. Q., Jackson, D. A., & Blow, J. J. (2007). Dormant origins licensed by excess Mcm2–7 are required  
668 for human cells to survive replicative stress. *Genes Dev*, 21(24), 3331–3341.  
669 doi:10.1101/gad.457807
- 670 Hinohara, K., Kobayashi, S., Kanauchi, H., Shimizu, S., Nishioka, K., Tsuji, E., . . . Gotoh, N. (2012).  
671 ErbB receptor tyrosine kinase/NF- $\kappa$ B signaling controls mammosphere formation in  
672 human breast cancer. *Proc Natl Acad Sci U S A*, 109(17), 6584–6589.  
673 doi:10.1073/pnas.1113271109
- 674 Ishiguro, T., Sato, A., Ohata, H., Ikarashi, Y., Takahashi, R. U., Ochiya, T., . . . Okamoto, K. (2016).  
675 Establishment and Characterization of an In Vitro Model of Ovarian Cancer Stem-like Cells  
676 with an Enhanced Proliferative Capacity. *Cancer Res*, 76(1), 150–160. doi:10.1158/0008–  
677 5472.CAN-15-0361
- 678 Kanke, M., Kodama, Y., Takahashi, T. S., Nakagawa, T., & Masukata, H. (2012). Mcm10 plays an  
679 essential role in origin DNA unwinding after loading of the CMG components. *EMBO J*, 31(9),  
680 2182–2194. doi:10.1038/emboj.2012.68
- 681 Kofuji, S., Hirayama, A., Eberhardt, A. O., Kawaguchi, R., Sugiura, Y., Sampetean, O., . . . Sasaki, A. T.  
682 (2019). IMP dehydrogenase-2 drives aberrant nucleolar activity and promotes  
683 tumorigenesis in glioblastoma. *Nat Cell Biol*, 21(8), 1003–1014. doi:10.1038/s41556-019–  
684 0363-9
- 685 Kotsantis, P., Petermann, E., & Boulton, S. J. (2018). Mechanisms of Oncogene-Induced Replication  
686 Stress: Jigsaw Falling into Place. *Cancer Discov*, 8(5), 537–555. doi:10.1158/2159–  
687 8290.CD-17-1461
- 688 Li, W. M., Huang, C. N., Ke, H. L., Li, C. C., Wei, Y. C., Yeh, H. C., . . . Wu, W. J. (2016). MCM10  
689 overexpression implicates adverse prognosis in urothelial carcinoma. *Oncotarget*, 7(47),  
690 77777–77792. doi:10.18632/oncotarget.12795
- 691 Li, Y., Atkinson, K., & Zhang, T. (2017). Combination of chemotherapy and cancer stem cell targeting  
692 agents: Preclinical and clinical studies. *Cancer Lett*, 396, 103–109.  
693 doi:10.1016/j.canlet.2017.03.008
- 694 Looke, M., Maloney, M. F., & Bell, S. P. (2017). Mcm10 regulates DNA replication elongation by  
695 stimulating the CMG replicative helicase. *Genes Dev*, 31(3), 291–305.  
696 doi:10.1101/gad.291336.116
- 697 Macheret, M., & Halazonetis, T. D. (2018). Intragenic origins due to short G1 phases underlie  
698 oncogene-induced DNA replication stress. *Nature*, 555(7694), 112–116.  
699 doi:10.1038/nature25507
- 700 Mahadevappa, R., Neves, H., Yuen, S. M., Jameel, M., Bai, Y., Yuen, H. F., . . . Kwok, H. F. (2018). DNA  
701 Replication Licensing Protein MCM10 Promotes Tumor Progression and Is a Novel  
702 Prognostic Biomarker and Potential Therapeutic Target in Breast Cancer. *Cancers (Basel)*,  
703 10(9). doi:10.3390/cancers10090282
- 704 Masai, H., Matsumoto, S., You, Z., Yoshizawa-Sugata, N., & Oda, M. (2010). Eukaryotic chromosome  
705 DNA replication: where, when, and how? *Annu Rev Biochem*, 79, 89–130.

- 706 doi:10.1146/annurev.biochem.052308.103205
- 707 Meyer, N., & Penn, L. Z. (2008). Reflecting on 25 years with MYC. *Nat Rev Cancer*, 8(12), 976–990.
- 708 doi:10.1038/nrc2231
- 709 Murayama, T., Nakaoku, T., Enari, M., Nishimura, T., Tominaga, K., Nakata, A., . . . Gotoh, N. (2016).
- 710 Oncogenic Fusion Gene CD74–NRG1 Confers Cancer Stem Cell–like Properties in Lung Cancer
- 711 through a IGF2 Autocrine/Paracrine Circuit. *Cancer Res*, 76(4), 974–983.
- 712 doi:10.1158/0008-5472.CAN-15-2135
- 713 Paulson, C. N., John, K., Baxley, R. M., Kurniawan, F., Orellana, K., Francis, R., . . . Bielinsky, A. K.
- 714 (2019). The anti-parasitic agent suramin and several of its analogues are inhibitors of the
- 715 DNA binding protein Mcm10. *Open Biol*, 9(8), 190117. doi:10.1098/rsob.190117
- 716 Pawitan, Y., Bjohle, J., Amler, L., Borg, A. L., Egyhazi, S., Hall, P., . . . Bergh, J. (2005). Gene expression
- 717 profiling spares early breast cancer patients from adjuvant therapy: derived and validated in
- 718 two population-based cohorts. *Breast Cancer Res*, 7(6), R953–964. doi:10.1186/bcr1325
- 719 Petropoulos, M., Champeris Tsaniras, S., Taraviras, S., & Lygerou, Z. (2019). Replication Licensing
- 720 Aberrations, Replication Stress, and Genomic Instability. *Trends Biochem Sci*, 44(9), 752–764.
- 721 doi:10.1016/j.tibs.2019.03.011
- 722 Pettitt, S. J., & Lord, C. J. (2019). Dissecting PARP inhibitor resistance with functional genomics. *Curr*
- 723 *Opin Genet Dev*, 54, 55–63. doi:10.1016/j.gde.2019.03.001
- 724 Ponti, D., Costa, A., Zaffaroni, N., Pratesi, G., Petrangolini, G., Coradini, D., . . . Daidone, M. G. (2005).
- 725 Isolation and in vitro propagation of tumorigenic breast cancer cells with stem/progenitor
- 726 cell properties. *Cancer Res*, 65(13), 5506–5511. doi:10.1158/0008-5472.CAN-05-0626
- 727 Samanta, D., Gilkes, D. M., Chaturvedi, P., Xiang, L., & Semenza, G. L. (2014). Hypoxia-inducible
- 728 factors are required for chemotherapy resistance of breast cancer stem cells. *Proc Natl Acad*
- 729 *Sci USA*, 111(50), E5429–5438. doi:10.1073/pnas.1421438111
- 730 Sansone, P., Storci, G., Tavolari, S., Guarnieri, T., Giovannini, C., Taffurelli, M., . . . Bonafe, M. (2007).
- 731 IL-6 triggers malignant features in mammospheres from human ductal breast carcinoma and
- 732 normal mammary gland. *J Clin Invest*, 117(12), 3988–4002. doi:10.1172/JCI32533
- 733 Saygin, C., Matei, D., Majeti, R., Reizes, O., & Lathia, J. D. (2019). Targeting Cancer Stemness in the
- 734 Clinic: From Hype to Hope. *Cell Stem Cell*, 24(1), 25–40. doi:10.1016/j.stem.2018.11.017
- 735 Schwab, R. A., & Niedzwiedz, W. (2011). Visualization of DNA replication in the vertebrate model
- 736 system DT40 using the DNA fiber technique. *J Vis Exp*(56), e3255. doi:10.3791/3255
- 737 Techer, H., Koundrioukoff, S., Nicolas, A., & Debatisse, M. (2017). The impact of replication stress on
- 738 replication dynamics and DNA damage in vertebrate cells. *Nat Rev Genet*, 18(9), 535–550.
- 739 doi:10.1038/nrg.2017.46
- 740 Tominaga, K., Minato, H., Murayama, T., Sasahara, A., Nishimura, T., Kiyokawa, E., . . . Gotoh, N.
- 741 (2019). Semaphorin signaling via MICAL3 induces symmetric cell division to expand breast
- 742 cancer stem-like cells. *Proc Natl Acad Sci U S A*, 116(2), 625–630.
- 743 doi:10.1073/pnas.1806851116
- 744 Torre, L. A., Bray, F., Siegel, R. L., Ferlay, J., Lortet-Tieulent, J., & Jemal, A. (2015). Global cancer
- 745 statistics, 2012. *CA Cancer J Clin*, 65(2), 87–108. doi:10.3322/caac.21262
- 746 van Deursen, F., Sengupta, S., De Piccoli, G., Sanchez-Diaz, A., & Labib, K. (2012). Mcm10 associates
- 747 with the loaded DNA helicase at replication origins and defines a novel step in its activation.
- 748 *EMBO J*, 31(9), 2195–2206. doi:10.1038/emboj.2012.69

- 749 Vesela, E., Chroma, K., Turi, Z., & Mistrik, M. (2017). Common Chemical Inductors of Replication  
750 Stress: Focus on Cell-Based Studies. *Biomolecules*, 7(1). doi:10.3390/biom7010019
- 751 Vijayraghavan, S., Tsai, F. L., & Schwacha, A. (2016). A Checkpoint-Related Function of the MCM  
752 Replicative Helicase Is Required to Avert Accumulation of RNA:DNA Hybrids during S-phase  
753 and Ensuing DSBs during G2/M. *PLoS Genet*, 12(8), e1006277.  
754 doi:10.1371/journal.pgen.1006277
- 755 Wasserman, M. R., Schauer, G. D., O'Donnell, M. E., & Liu, S. (2019). Replication Fork Activation Is  
756 Enabled by a Single-Stranded DNA Gate in CMG Helicase. *Cell*, 178(3), 600–611 e616.  
757 doi:10.1016/j.cell.2019.06.032
- 758 Watase, G., Takisawa, H., & Kanemaki, M. T. (2012). Mcm10 plays a role in functioning of the  
759 eukaryotic replicative DNA helicase, Cdc45-Mcm-GINS. *Curr Biol*, 22(4), 343–349.  
760 doi:10.1016/j.cub.2012.01.023
- 761 Woodward, A. M., Gohler, T., Luciani, M. G., Oehlmann, M., Ge, X., Gartner, A., . . . Blow, J. J. (2006).  
762 Excess Mcm2–7 license dormant origins of replication that can be used under conditions of  
763 replicative stress. *J Cell Biol*, 173(5), 673–683. doi:10.1083/jcb.200602108
- 764 Zeman, M. K., & Cimprich, K. A. (2014). Causes and consequences of replication stress. *Nat Cell Biol*,  
765 16(1), 2–9. doi:10.1038/ncb2897
- 766 Zhang, Y., & Weinberg, R. A. (2018). Epithelial-to-mesenchymal transition in cancer: complexity and  
767 opportunities. *Front Med*, 12(4), 361–373. doi:10.1007/s11684-018-0656-6
- 768

769 **Figure legends**

770 **Figure 1. CSCs are enriched in sphere culture population and show activation of distinct**  
771 **pathways and c-Myc expression is upregulated in CSC-enriched spheroid cells**

772 **a**, Images of PDC #1 cultured in adherent condition (adh; left), and in sphere culture condition  
773 (sph; right) are shown. Scale bar = 100  $\mu$ m. **b**, Results of limiting dilution assay of PDC#1  
774 obtained under adherent and sphere culture conditions were compared. CSC frequency and p-  
775 value were determined using the ELDA software  
776 (<http://bioinf.wehi.edu.au/software/elda/index.html>). **c**, Expression levels of MCM10 and Nanog  
777 in MCF7 and PDC #1 cells were compared between cells cultured under adherent and sphere  
778 conditions. Actin was used for loading control. **d**, (Left) Immunofluorescence images of Nanog  
779 staining in PDC #1 cells cultured under adherent and sphere conditions are shown. Nuclei were  
780 counterstained with DAPI. Arrows indicate cells with strong Nanog staining. Scale bar = 50  $\mu$ m.  
781 (Right) The intensities of Nanog staining were quantified by using ImageJ software. One hundred  
782 cells in each slide were counted (mean  $\pm$ SD, n = 3; \*\*\*p < 0.001). **e**, PDC #1 cells obtained by  
783 adherent and sphere culture conditions were stained with CD44 and CD24 antibodies, and then  
784 subjected to flow cytometry analysis. **f**, Schematic of the experimental procedure. Cancer cells  
785 were separated from clinical breast tumor samples, and then they were cultured in adherent and  
786 sphere conditions. RNAs were collected from both two conditions for RNA-seq transcriptome  
787 analysis. **g**, Gene set enrichment analysis (GSEA) was used to compare gene expression profiles  
788 of PDC #1-#3. Gene sets related to Drug resistance (KANG DOXORUBICIN RESISTANCE UP),  
789 EMT (SARRIO EPITHELIAL MESENCHYMAL TRANSITION UP), Myc targets (YU MYC  
790 TARGETS UP) and Replication stress response (REACTOME ACTIVATION OF ATR IN  
791 RESPONSE TO REPLICATION STRESS) were upregulated in the sphere population. NES;  
792 normalized enrichment score, FDR; false discovery ratio. **(h)** Expression level of c-Myc in PDC  
793 #1, #4 and #6 as determined by immunoblotting, were compared between cells cultured in the  
794 adherent and sphere conditions. Actin was used for loading control. **(i)** (Left)

795 Immunofluorescence images of c-Myc staining in PDC #1 cells cultured in the adherent and  
796 sphere conditions are shown. Nuclei were counterstained with DAPI. Arrows indicate cells with  
797 strong c-Myc staining. Scale bar = 50  $\mu$ m. (Right) The intensities of c-Myc staining were  
798 quantified by using ImageJ software. One hundred cells in each slide were counted (mean  $\pm$ SD,  
799  $n = 3$ ; \*\*\* $p < 0.001$ ). **c, h**, Immunoblotting experiments were independently performed 3 times  
800 and representative results were presented.

801

802 **Figure 2. c-Myc expression and DNA replication stress are upregulated in CSC-enriched**  
803 **spheroid cells**

804 **a**, Expression levels of ATR, p-ATR, Chk1 and p-Chk1 as determined by immunoblotting, were  
805 compared between cells cultured in the adherent and sphere conditions. Expression was quantified  
806 by ImageJ and normalized to Actin. The exposure time was adjusted so that the intensities of the  
807 bands were within the linear range. Experiments were independently performed 3 times and  
808 representative results were presented. **b**, Schematic of the experimental procedure. Cells were  
809 incubated sequentially with IdU then CldU. Labeled DNA was spread on glass slides, and then  
810 stained with antibodies for IdU (green) and CldU (red). If replication started in the first 30 min,  
811 bidirectional forks stained with green and red could be observed. **c**, Proportion of asymmetric  
812 forks, representative of replication stress. The ratio of longer CldU tracks (L1) to shorter tracks  
813 (L2) was calculated; forks with  $L1/L2 \geq 1.3$  were regarded as asymmetric. Thirty bidirectional  
814 forks in each slide were counted. Three slides for each population were prepared (mean  $\pm$  SEM,  
815  $n = 3$ ; \* $p < 0.05$ ). Scale bar = 10  $\mu$ m. **d**, Proportion of stalled forks, labeled only with green was  
816 calculated. Two hundred labeled forks in each slide were counted. Three slides for each population  
817 were prepared (mean  $\pm$  SEM,  $n = 3$ ; \*\* $p < 0.01$ ). Scale bar = 5  $\mu$ m. **e**, Immunofluorescence images  
818 of RNA/DNA hybrid staining in PDCs were shown. Cells were cultured in the adherent condition  
819 with or without RNaseH treatment. Nuclei were counterstained with DAPI. Scale bar = 10  $\mu$ m. **f**,  
820 (Left) Immunofluorescence images of RNA/DNA hybrid staining in PDCs cultured in the



821 adherent and sphere conditions are shown. (Right) Number of RNA/DNA hybrid foci in each cell  
822 was counted and compared between the two conditions. Hundred cells in each slide were counted.  
823 Three slides for each population were prepared (mean  $\pm$  SEM, n = 3; \*\*\*p < 0.001).

824

### 825 **Figure 3. c-Myc expression contributes to replication stress**

826 **a**, Knockdown efficiencies of siRNAs targeting *c-Myc* (siMyc #1 and #2) or control siRNA  
827 (siCtrl) in PDCs was compared by immunoblotting (left) and qPCR (right) (mean  $\pm$  SEM, n = 3;  
828 \*\*\*p < 0.001). **b**, Number of RNA/DNA hybrid foci in each cell was counted and compared  
829 among spheroid cells treated with siCtrl, *siMyc* #1, and *siMyc* #2. Scale bar = 10  $\mu$ m. Hundred  
830 cells in each slide were counted. Three slides for each population were prepared (mean  $\pm$  SEM, n  
831 = 3; \*\*\*p < 0.001). **c**, Expression levels of ATR, p-ATR, Chk1 and p-Chk1 as determined by  
832 immunoblotting, were compared among cells treated with siCtrl, *siMyc* #1, and *siMyc* #2.  
833 Expression was quantified by ImageJ and normalized to Actin. **a,c**, Immunoblotting experiments  
834 were independently performed 3 times and representative results were presented.

835

### 836 **Figure 4. MCM10 expression is upregulated in CSC-enriched spheroid cells and MCM10 is** 837 **co-localized with RNA/DNA hybrid foci**

838 **a**, Expression levels of MCM10 in MCF10A, MCF7, BT20, and BT474 were compared by  
839 immunoblotting. Actin was used for loading control. **b**, Expression level of MCM10 in PDCs  
840 treated with siCtrl, *siMyc* #1 and *siMyc* #2 was compared by immunoblotting (left) and qPCR  
841 (right) (mean  $\pm$  SEM, n = 3; \*\*\*p < 0.001). Actin was used for loading control. **c**, Expression  
842 levels of *MCM10* in PDC #1, #4, #5 and MCF7 cells were compared between cells cultured in  
843 the adherent and sphere conditions, by qPCR (mean  $\pm$  SEM, n = 3; \*\*\*p < 0.001, \*\*p < 0.01). **d**,  
844 Expression levels of MCM10 were compared in cells cultured in the adherent and sphere  
845 conditions, by immunoblotting. Actin was used for loading control. **e**, Immunofluorescence  
846 images of MCM10 staining in PDCs after transfection with control siRNA (left) or *siMCM10* #1

847 (right) are shown. Nuclei were counterstained with DAPI. Scale bar = 5  $\mu$ m. Experiments were  
848 independently performed 3 times and representative results were presented. **f**, (left)  
849 Immunofluorescence images of MCM10 staining in PDCs cultured in the adherent and sphere  
850 conditions are shown. Nuclei were counterstained with DAPI. Scale bar = 50  $\mu$ m. (right) The  
851 intensities of c-Myc staining were quantified by using ImageJ software. One hundred cells in each  
852 slide were counted (mean  $\pm$ SD, n = 3; \*\*\*p < 0.001). **g**, (Left) Immunofluorescence images of  
853 MCM10 and S9.6 antibody staining in PDCs cultured in the sphere conditions are shown. The  
854 median values of the intensities of MCM10 staining (**f**) were used as the cut-off to determine  
855 MCM10-low cells and MCM10-high cells. Nuclei were counterstained with DAPI. Arrowheads  
856 indicate double positive puncta. Scale bar = 5  $\mu$ m. (Right) Scatter plot showing total number of  
857 MCM10-positive puncta and double positive puncta in each cell. MCM10-positive puncta and  
858 double positive puncta were quantified by using ImageJ software. Fifty cells were counted for  
859 each group. (mean  $\pm$  SD; \*\*\*p < 0.001). **a,b,d**, Immunoblotting experiments were independently  
860 performed 3 times and representative results were presented.

861

### 862 **Figure 5. MCM10 plays important roles for proliferation of cancer cells**

863 **a**, Kaplan–Meier survival curves were drawn using the Stockholm cohort (GSE1456; overall  
864 survival) and the Uppsala, Oxford, Stockholm, IGR, GUYT, and CRH cohorts (GSE7390; overall  
865 survival). The median values were used as the cut-off. P-values were obtained by log-rank test.  
866 **b,c**, Knockdown efficiencies of siRNAs targeting *MCM10* (siMCM10 #1 and #2) in MCF7, BT20  
867 and PDC #1, and DOX-inducible knockout in PDC #8 were compared by immunoblotting (**b**) and  
868 qPCR (**c**) (mean  $\pm$  SEM, n = 3; \*\*\*p < 0.001). Immunoblotting experiments were independently  
869 performed 3 times and representative results were presented. **d**, Cells were seeded in 12-well  
870 plates (10,000 cells/well) and cultured. Then they were harvested and counted after 4 days (mean  
871  $\pm$  SEM, n = 3; \*\*p < 0.01, \*p < 0.05). **e**, (Left) PDCs treated with siCtrl, *siMCM10* #1, or  
872 *siMCM10* #2 were incubated with BrdU for 30 min. DNA and incorporated BrdU content were

873 analyzed by flow cytometry. (Right) Proportion of BrdU positive cells was averaged from three  
874 biological replicates (mean  $\pm$  SEM, n = 3; \*\*\*p < 0.001, \*\*p < 0.01).

875

876 **Figure 6. MCM10 plays important roles for CSC properties**

877 **a**, (Left) Representative images of tumor spheres. PDC #1, #7 and MCF7 cells treated with siRNA  
878 targeting *MCM10* and DOX-inducible *MCM10* knockout PDC #8 cells were cultured under  
879 sphere conditions. Scale bar = 100  $\mu$ m. (Right) Quantification of tumor sphere formation  
880 efficiency. Spheres were formed for 6 days (mean  $\pm$  SEM, n = 4; \*\*\*p < 0.001, \*\*p < 0.01, \*p <  
881 0.05). **b**, MCF7 and BT20 cells treated with siCtrl, *siMCM10* #1 or *siMCM10* #2 were stained  
882 with CD44 and CD24 antibodies, and then subjected to flow cytometry analysis. **c**, Expression  
883 levels of Nanog and Oct-4, as determined by immunoblotting, were compared between PDCs  
884 treated with siCtrl, *siMCM10* #1 and *siMCM10* #2. **d**, Expression level of *MCM10* was analyzed  
885 by qPCR in PDCs introduced with shCtrl, *shMCM10* #1, or *shMCM10* #2 (mean  $\pm$  SEM, n = 3;  
886 \*\*\*p < 0.001). **e**, Expression levels of MCM10 and Nanog were compared by immunoblotting in  
887 PDCs introduced with shCtrl, *shMCM10* #1, or *shMCM10* #2. **f**, Results of limiting dilution assay  
888 of shRNA-introduced PDCs #1 were shown. Tumors larger than 50 mm<sup>3</sup> were counted. CSC  
889 frequency and p-values were determined using the ELDA software. **g,h**, Growth curves (**g**) and  
890 representative images (**h**) of tumors are shown ( $1 \times 10^5$  cells/site). Scale bar = 10 mm. **c,e**,  
891 Immunoblotting experiments were independently performed 3 times and representative results  
892 were presented.

893

894 **Figure 7. Paclitaxel-resistant cancer cells are dependent on MCM10 for their maintenance**

895 **a**, PDCs were seeded in 12-well plates (10,000 cells/well) and cultured with 10 nM paclitaxel or  
896 control DMSO for 3 days. Cells were harvested and counted (mean  $\pm$  SEM, n = 3; \*\*\*p < 0.001).  
897 **b**, Those survived cells after the treatment with paclitaxel or DMSO were used for analyzing  
898 sphere forming ability. Spheres were counted after 6 days (mean  $\pm$  SEM, n = 4; \*\*p < 0.01). **c,d**,

899 The survived cells after the treatment with paclitaxel or DMSO were treated with siRNA for  
900 *MCM10* or control siRNA (Ctrl), and then cultured in the sphere conditions. Expression levels of  
901 Nanog, c-Myc and MCM10, as determined by immunoblotting, were compared (**c**). Expression  
902 was quantified by ImageJ and normalized to Actin. The exposure time was adjusted so that the  
903 intensities of the bands were within the linear range. Experiments were independently performed  
904 3 times and representative results were presented. **d**, Representative images of tumor spheres are  
905 shown (upper panels). Scale bar = 100  $\mu\text{m}$ . Spheres were counted after 4 days (mean  $\pm$  SEM, n =  
906 4; \*\*\* $p < 0.001$ , \*\* $p < 0.01$ ) (lower panel). **e**, Models of MCM10 function in CSCs and  
907 differentiated cancer cells are illustrated. In CSCs, upregulation of c-Myc leads to higher level of  
908 replication stress due to collisions between transcription machinery and replication machinery.  
909 MCM10 is necessary to deal with such DNA replication stress. MCM10 promotes completion of  
910 DNA replication by activating dormant origins near the stalled forks.

# Figure 1

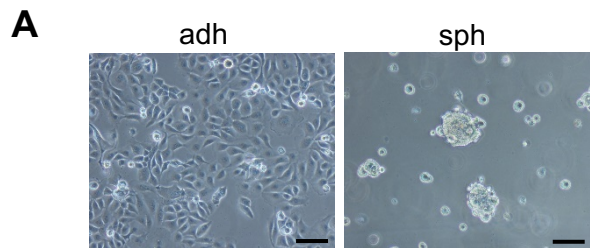

**B** *In vivo* limiting dilution assay

|     | Cells (per site) |                 |                 | CSC frequency | Probability (vs adh) |
|-----|------------------|-----------------|-----------------|---------------|----------------------|
|     | 10 <sup>3</sup>  | 10 <sup>4</sup> | 10 <sup>5</sup> |               |                      |
| adh | 0/4              | 3/4             | 4/4             | 1/8731        | -                    |
| sph | 3/4              | 4/4             | 4/4             | 1/721         | 0.00547              |

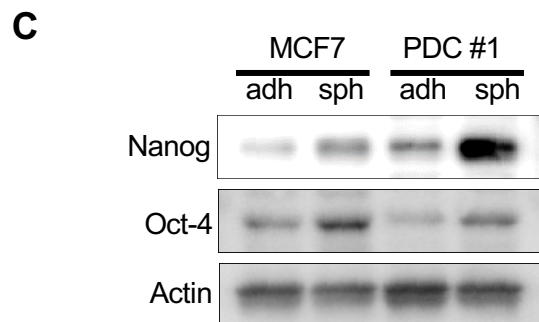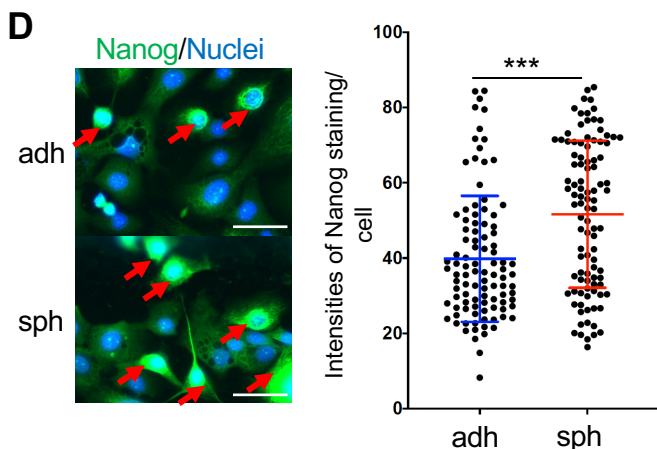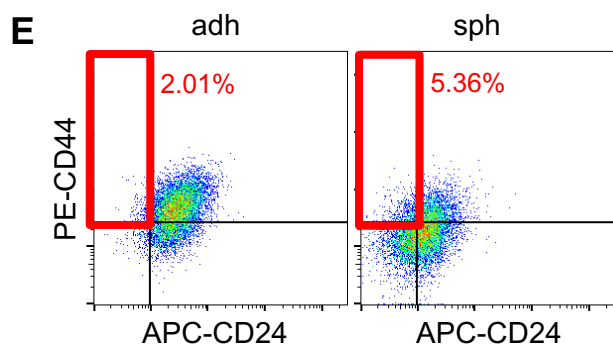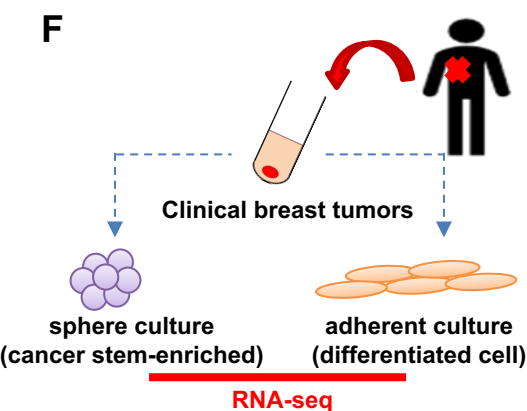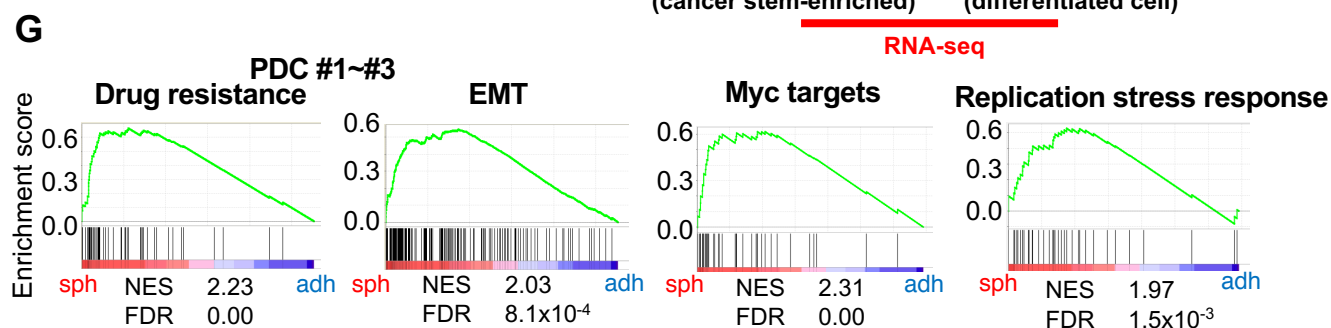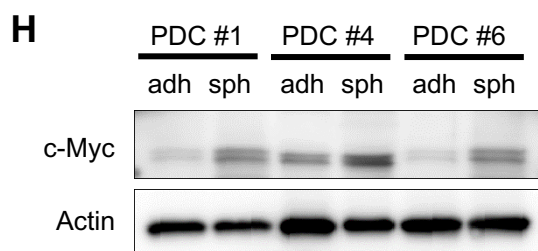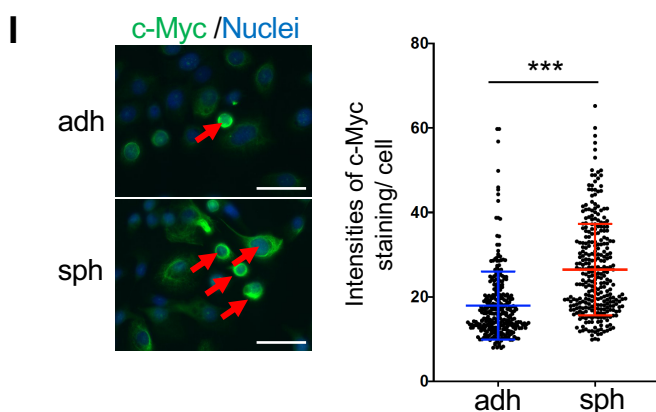

**Figure 2**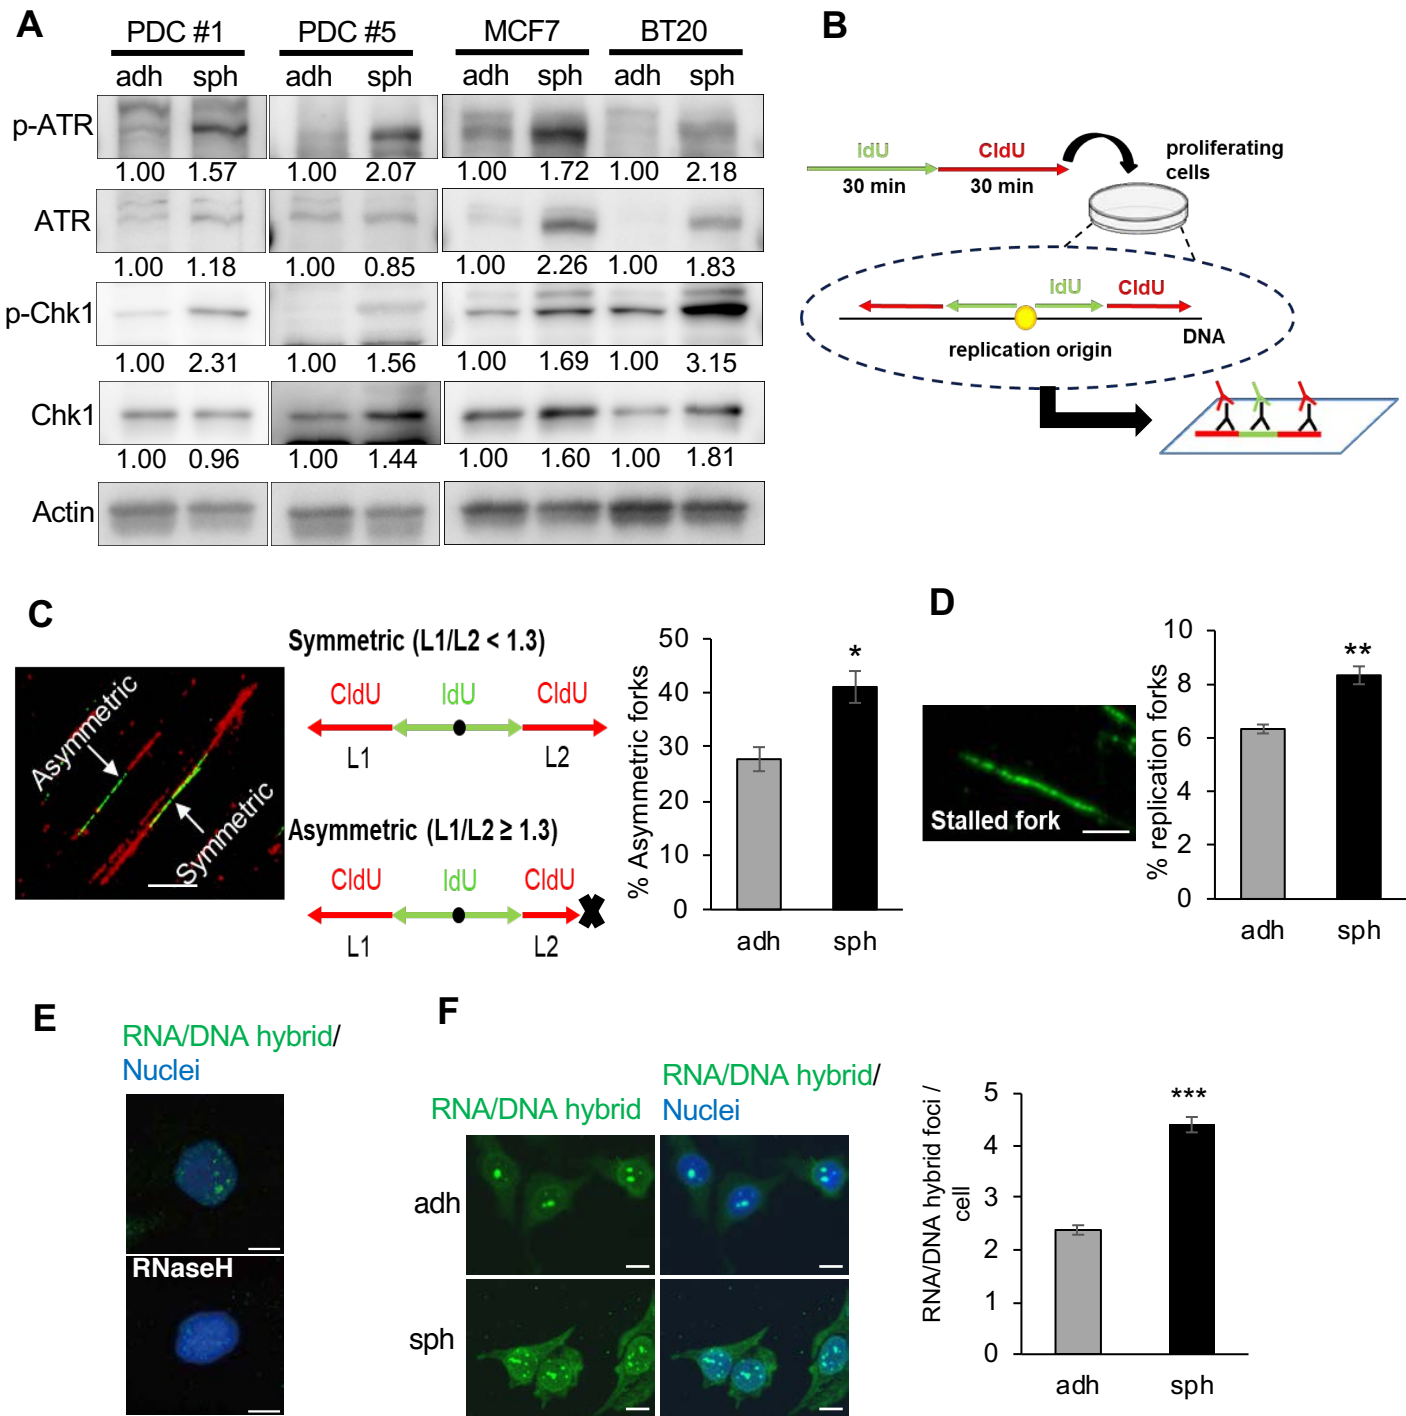

**Figure 3**

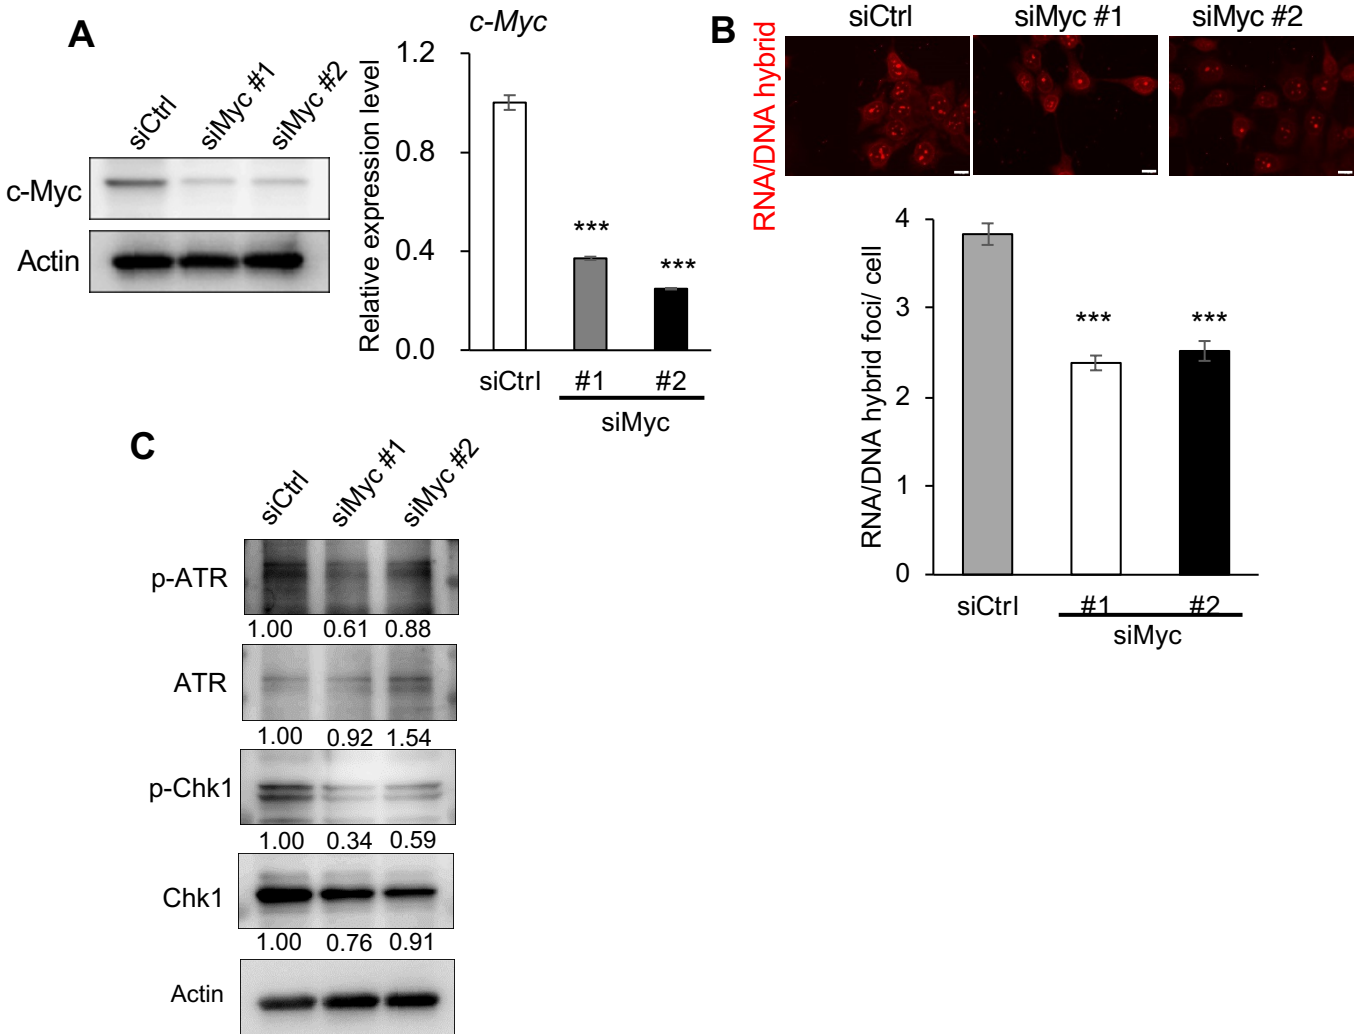

**Figure 4**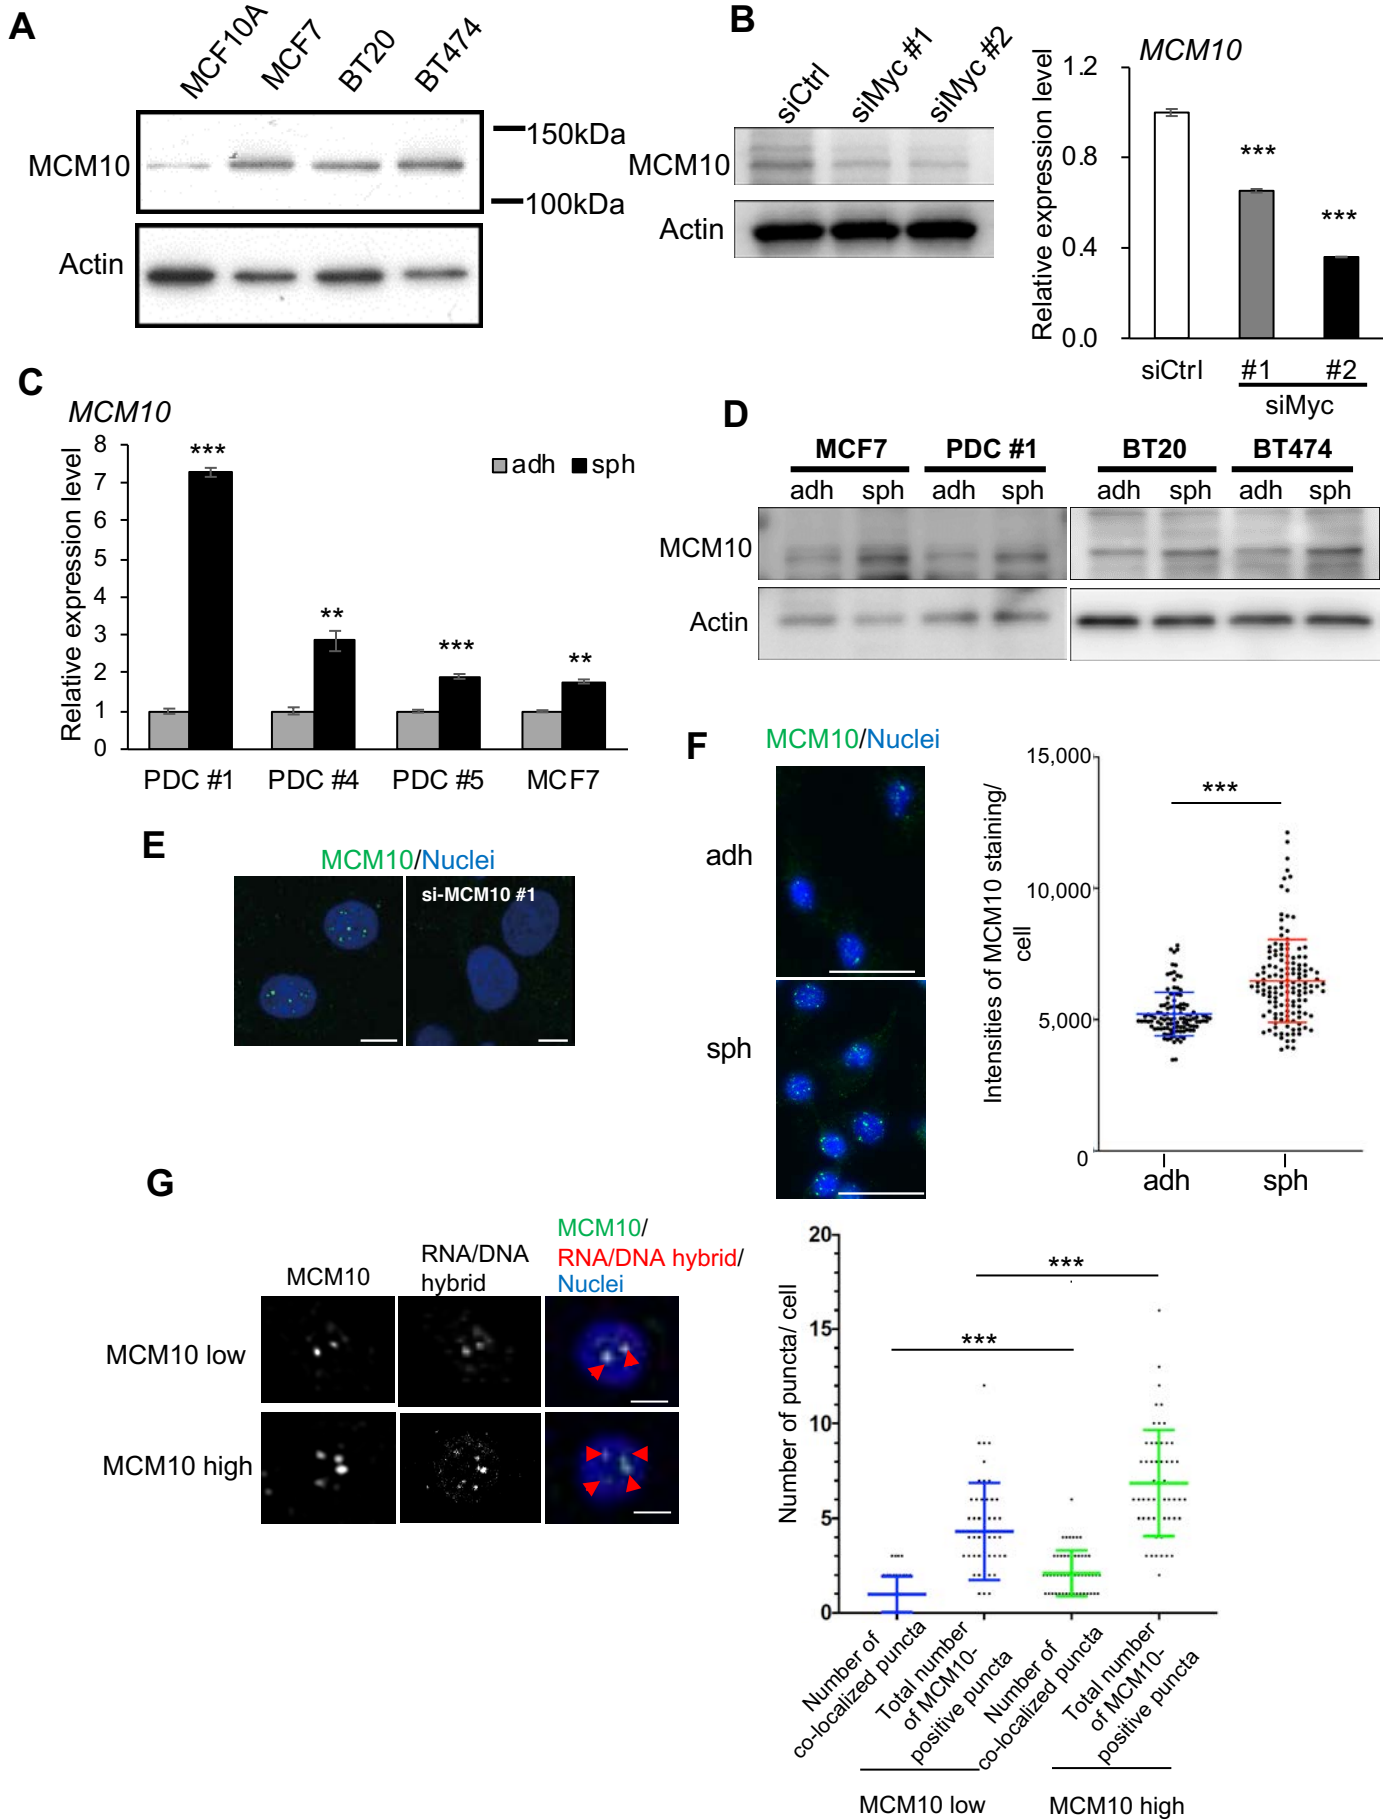



# Figure 5

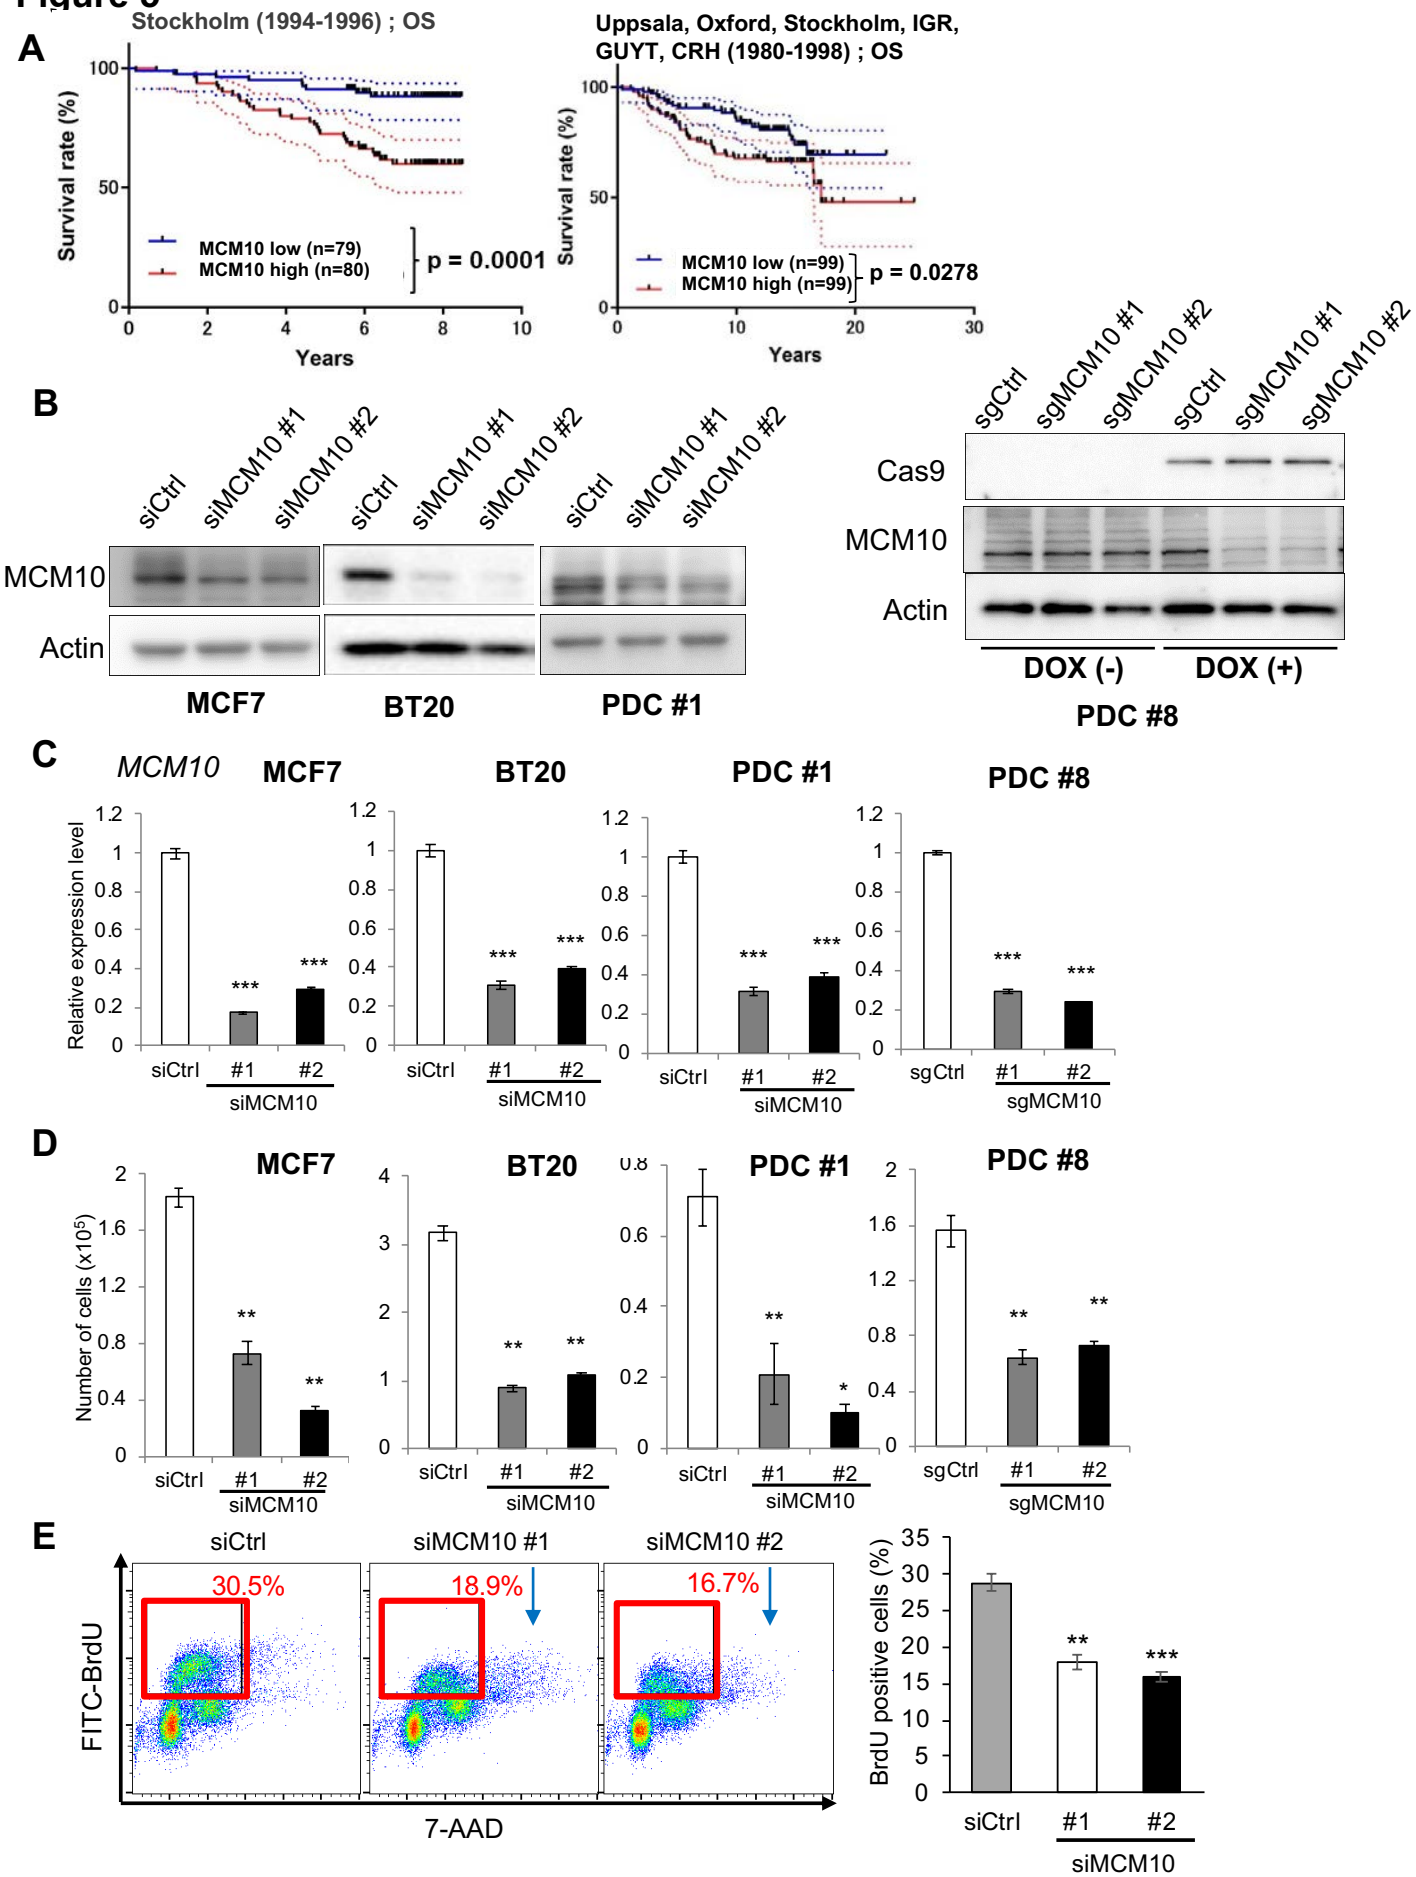

**Figure 6**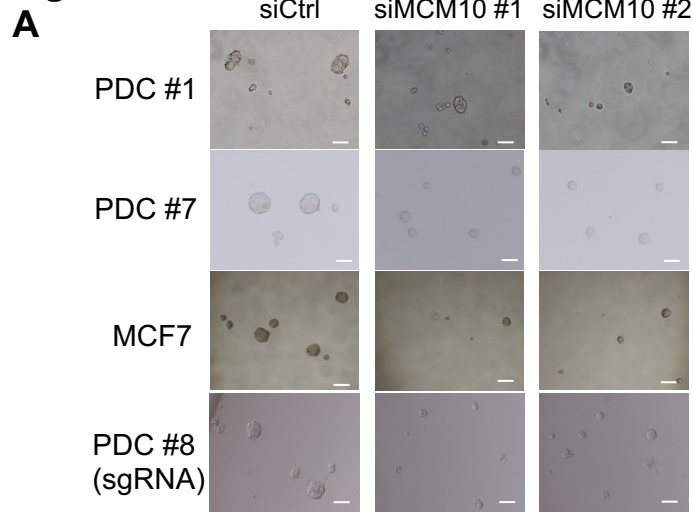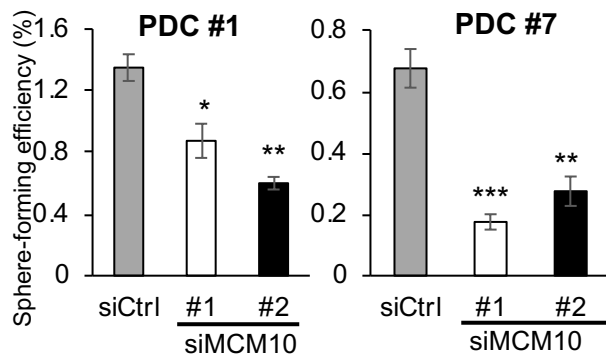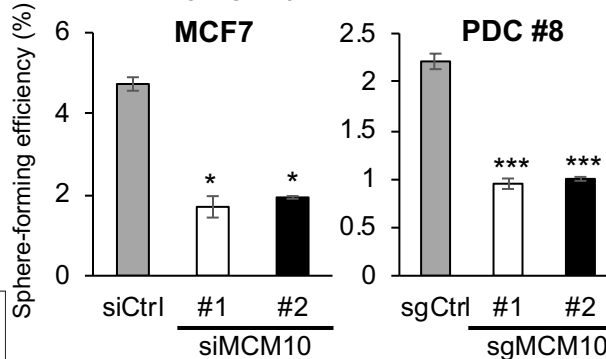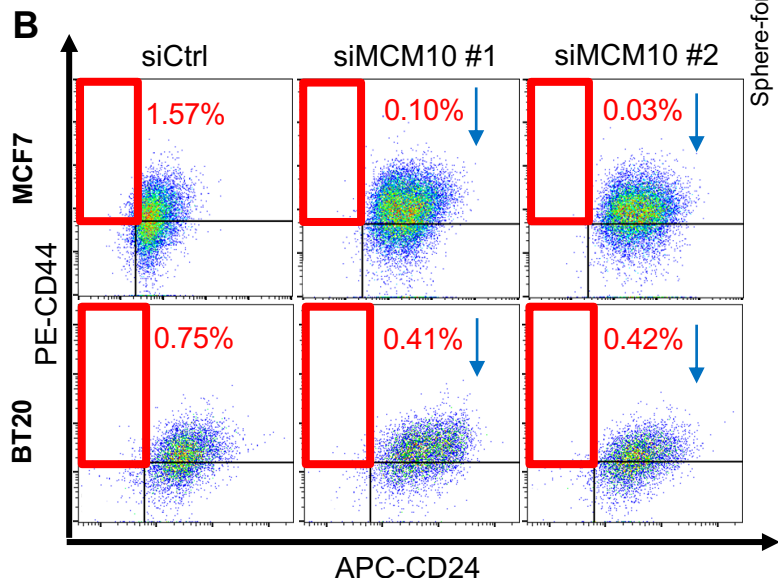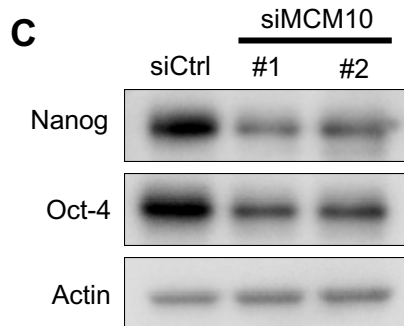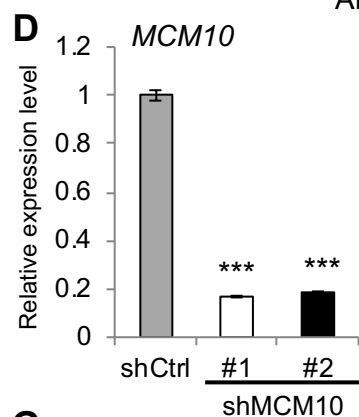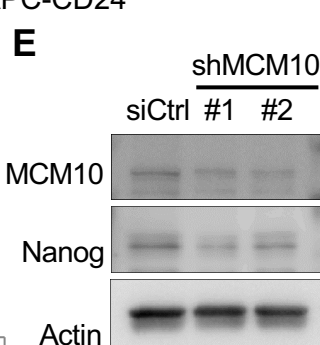

**F**

*In vivo* limiting dilution assay

|            | Cells (per site) |                 |                 | CSC frequency | Probability (vs shCtrl) |
|------------|------------------|-----------------|-----------------|---------------|-------------------------|
|            | 10 <sup>3</sup>  | 10 <sup>4</sup> | 10 <sup>5</sup> |               |                         |
| shCtrl     | 3/4              | 4/4             | 4/4             | 1/721         | -                       |
| shMCM10 #1 | 0/4              | 3/4             | 3/4             | 1/36090       | 2.51E-06                |
| shMCM10 #2 | 1/4              | 3/4             | 3/4             | 1/29343       | 6.18E-06                |

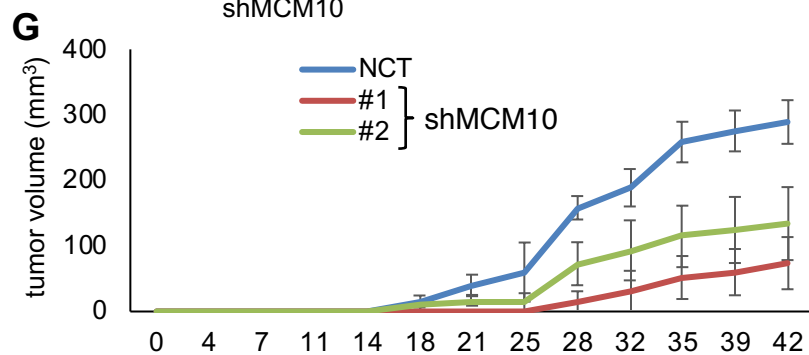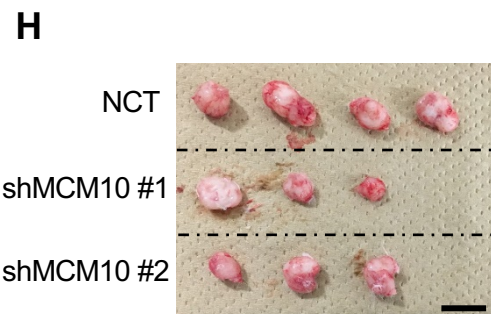

**Figure 7****A**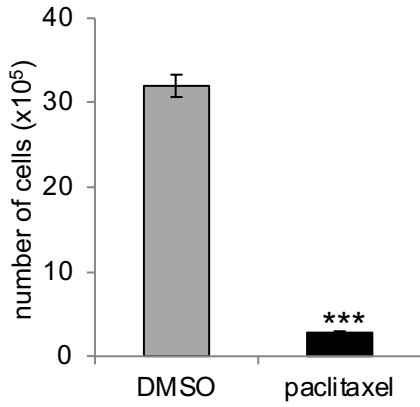**B**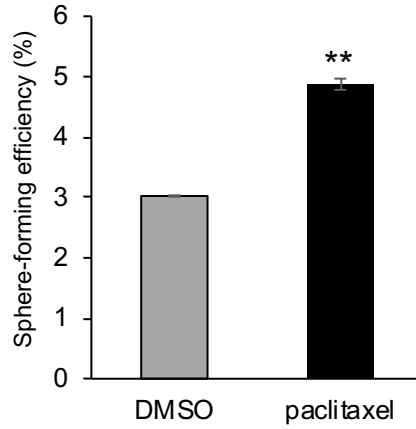**C**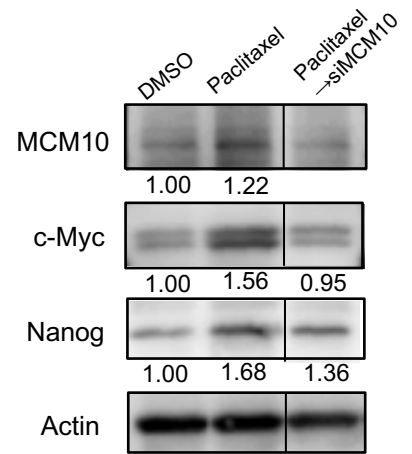**D**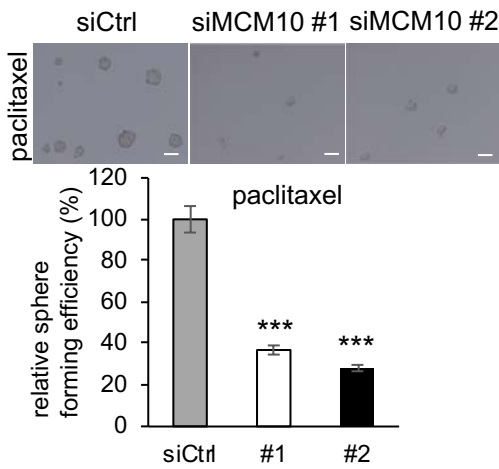**E**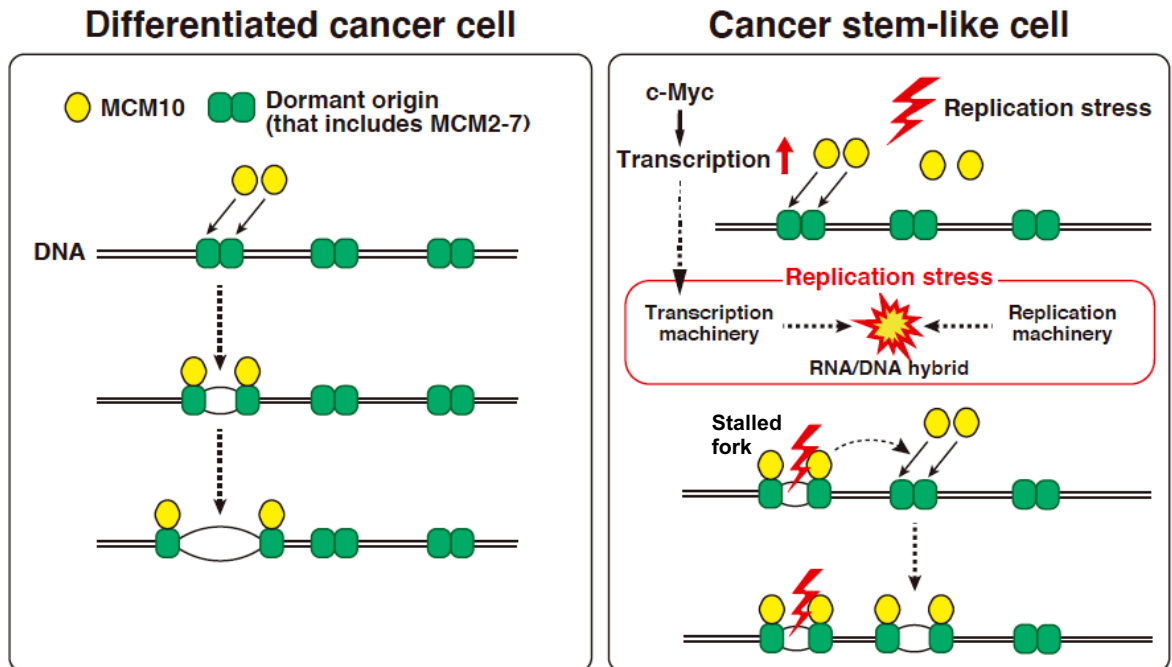

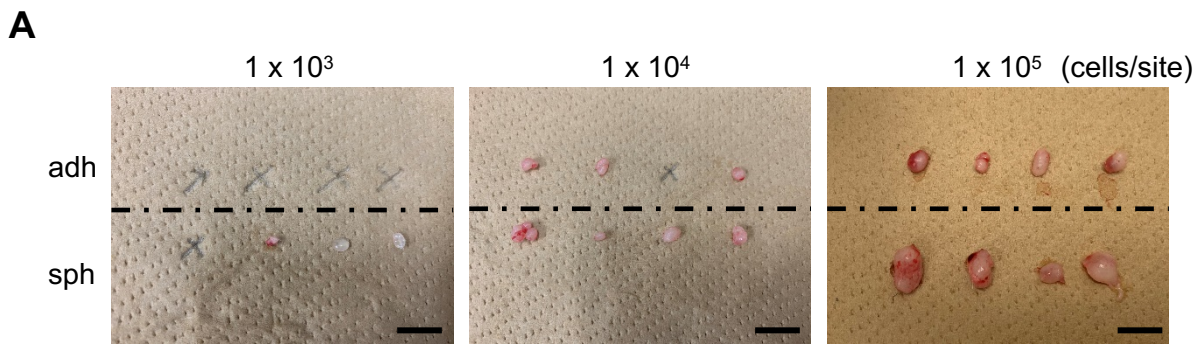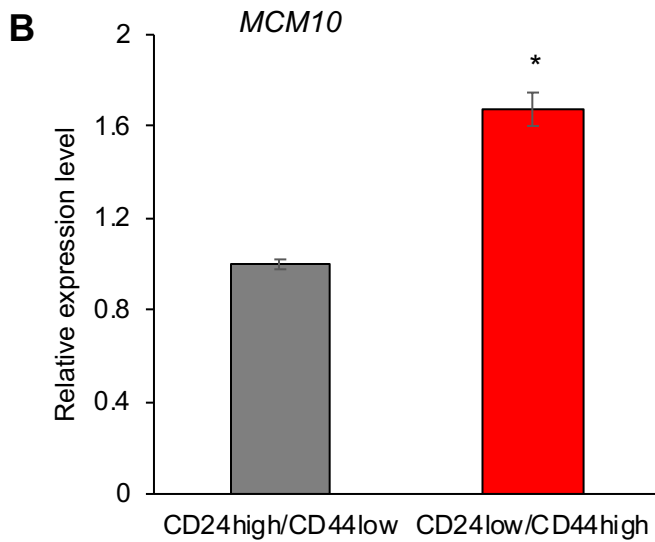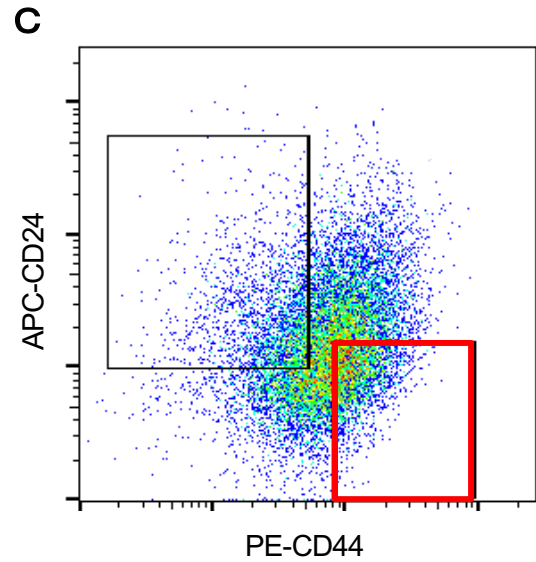

**Supplementary Figure 1. a**, Representative images of tumors formed in the *in vivo* limiting dilution assay ( $1 \times 10^3$ ,  $10^4$  and  $10^5$  cells/site). Scale bar = 10 mm. **b**, **c**, Expression level of *MCM10* was compared by qPCR between the CD24<sup>-/low</sup>/CD44<sup>high</sup> CSC-enriched population and the CD24<sup>high</sup>/CD44<sup>low</sup> control population. The PDC #6 cells were analyzed. (mean  $\pm$  SEM, n = 3; \*p < 0.05).

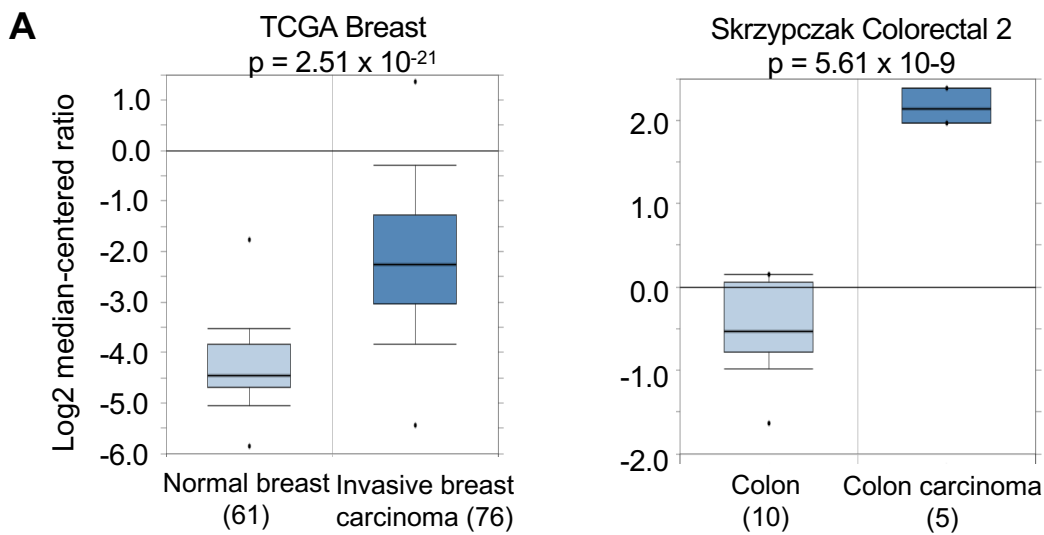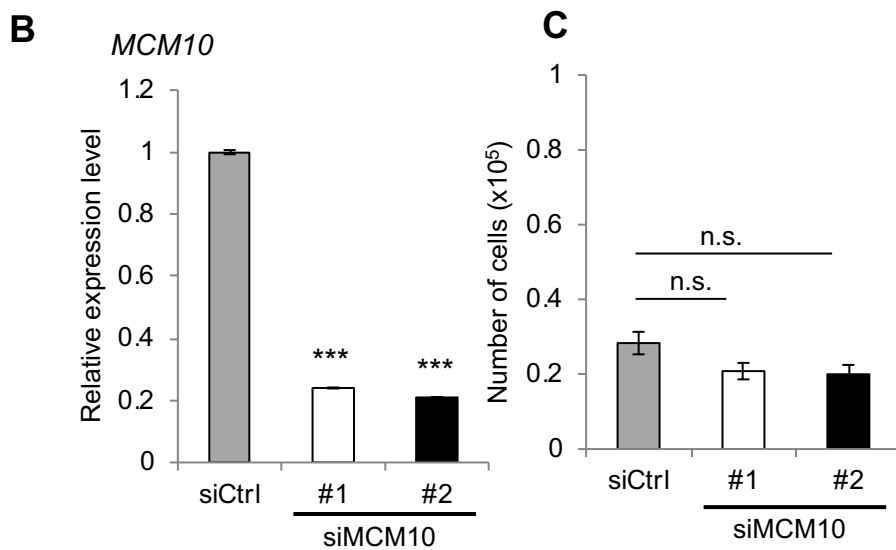

**Supplementary Figure 2. a**, *MCM10* expression was compared between non-malignant cells and cancer cells in breast and colon using the OncoPrint cancer gene expression database (Right; TCGA Breast, Left; Skrzypczak Colorectal 2). P-values were calculated by Student's t-test. **b,c**, MCF10A treated with siCtrl or *siMCM10*. Knockdown efficiencies of siRNAs (**b**) and growth rates (**c**) were compared.

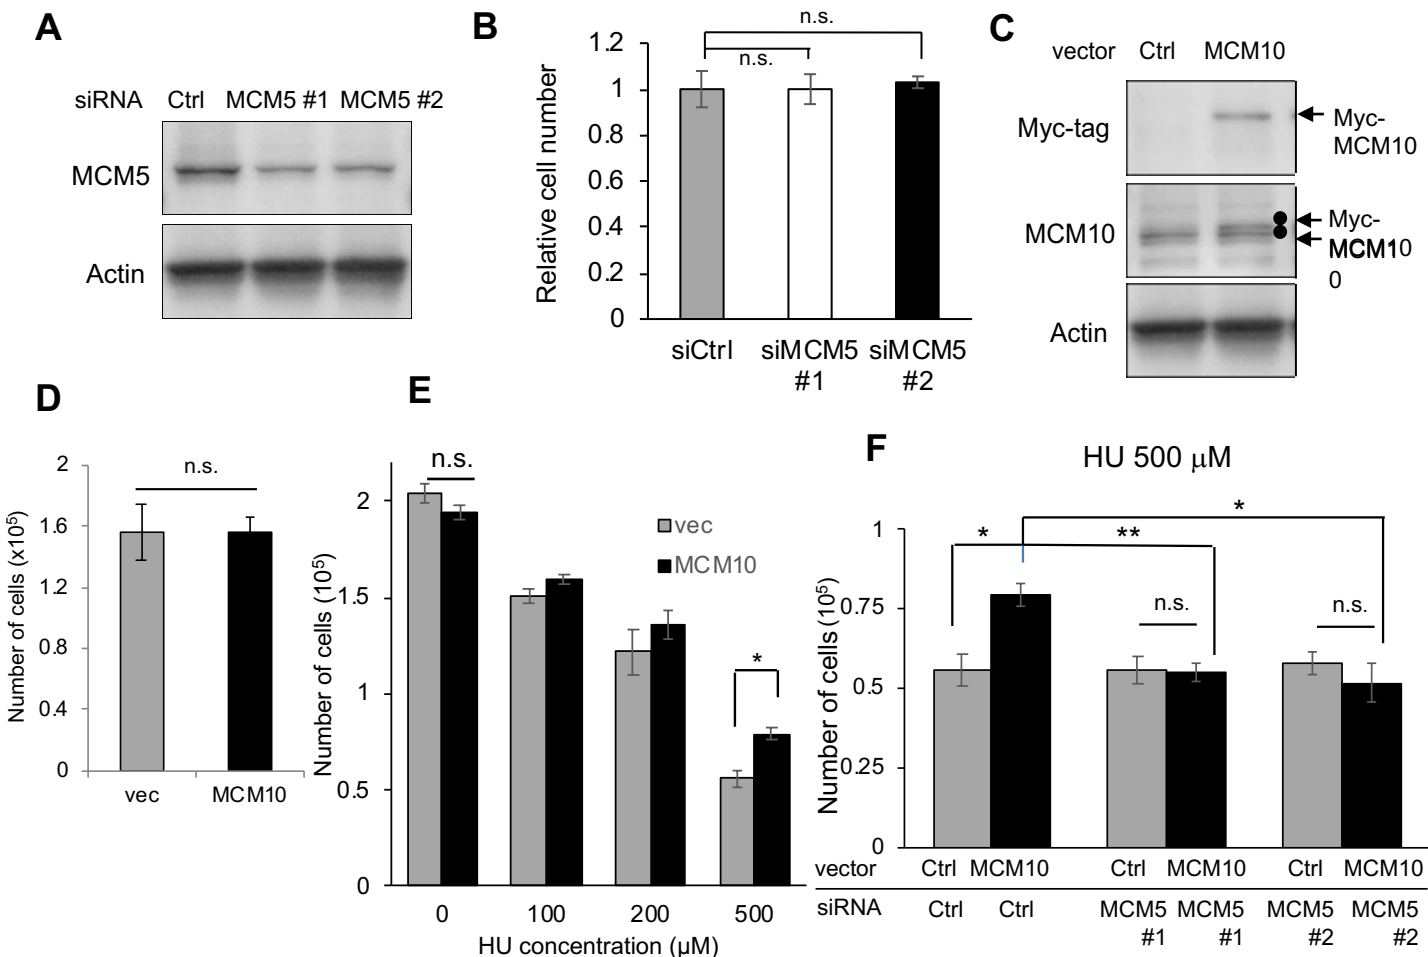

**G**

*In vitro* limiting dilution assay

|            | Cells (per site) |     |     |     |      |      | CSC frequency | Probability (vs shCtrl) |
|------------|------------------|-----|-----|-----|------|------|---------------|-------------------------|
|            | 63               | 125 | 250 | 500 | 1000 | 2000 |               |                         |
| shCtrl     | 0/8              | 1/8 | 5/8 | 7/8 | 8/8  | 8/8  | 1/319         | -                       |
| shMCM10 #1 | 0/8              | 0/8 | 1/8 | 4/8 | 8/8  | 8/8  | 1/652         | 0.0456                  |
| shMCM10 #2 | 0/8              | 0/8 | 1/8 | 3/8 | 8/8  | 8/8  | 1/716         | 0.0241                  |

**Supplementary Figure 3. a, b**, Expression levels of MCM5 were compared in MCF7 cells treated with siCtrl or *siMCM5* (a). Number of cells were counted after 4 days (mean  $\pm$  SEM, n = 3) (b). **c,d**, Expression levels of endogenous MCM10 and Myc-tagged MCM10, as determined by immunoblotting, were compared among cells transfected with the indicated expression vectors (c). Number of cells were counted after 4 days (mean  $\pm$  SEM, n = 3)(d). **e,f**, MCF7 cells transfected with the indicated vectors (e) and siRNAs (f) were seeded in a 12-well plate (10,000 cells/well). Forty-eight hours later, they were treated with indicated concentrations of HU for an additional 48 h. Cells were harvested and counted (mean  $\pm$  SEM, n = 3; \*\*p < 0.01, \*p < 0.05). **g**, In vitro limiting dilution assay for MCM10-depleted cells in patient-derived breast cancer cells: 2,000, 1,000, 500, 250, 125, or 63 cells were seeded in each well of a 96-well ultra-low-attachment plates. Results were obtained 7 days after seeding. CSC frequency and p-values were determined using the ELDA software.

**Supplementary Table 1.** Characteristics of clinical breast tumors used in this study

| PDC # | ER | PgR | HER2       | Molecular subtypes |
|-------|----|-----|------------|--------------------|
| 1     | -  | -   | 0          | Triple negative    |
| 2     | 3+ | 3+  | 2+ (FISH+) | Luminal HER2       |
| 3     | 3+ | -   | 3+         | Luminal HER2       |
| 4     | -  | -   | 2+ (FISH+) | HER2               |
| 5     | -  | -   | 2+ (FISH-) | Luminal like       |
| 6     | +  | +   | 2+ (FISH-) | Luminal like       |
| 7     | -  | +   | -          | Luminal like       |
| 8     | -  | -   | -          | Ovarian cancer     |

**Supplementary Table 2.** Genes included in Reactome\_DNA\_Replication gene set and the ratios of expression levels of each gene, sphere cells (SPH) / adherent cells (ADH)

| Rank | Gene symbol | SPH/ADH | Rank | Gene symbol | SPH/ADH | Rank | Gene symbol | SPH/ADH | Rank | Gene symbol | SPH/ADH |
|------|-------------|---------|------|-------------|---------|------|-------------|---------|------|-------------|---------|
| 1    | GMNN        | 37.044  | 51   | CENPL       | 3.325   | 101  | NSL1        | 1.746   | 151  | PSMA4       | 1.128   |
| 2    | SPC25       | 28.289  | 52   | ORC1        | 3.265   | 102  | PSMC3       | 1.743   | 152  | PSMB3       | 1.114   |
| 3    | RPS27A      | 27.516  | 53   | RFC2        | 3.244   | 103  | PSMA3       | 1.739   | 153  | CDKN1B      | 1.108   |
| 4    | PSME1       | 21.896  | 54   | PPP2R5B     | 3.204   | 104  | PMF1        | 1.733   | 154  | PPP2R5C     | 1.108   |
| 5    | MCM10       | 15.916  | 55   | CDC20       | 3.180   | 105  | RPA2        | 1.720   | 155  | PPP2CA      | 1.105   |
| 6    | CDT1        | 15.123  | 56   | MCM4        | 3.153   | 106  | PSMA5       | 1.707   | 156  | PPP2R1B     | 1.103   |
| 7    | PSMC2       | 13.974  | 57   | RANBP2      | 3.138   | 107  | PSMD11      | 1.700   | 157  | CDK2        | 1.094   |
| 8    | CENPI       | 13.831  | 58   | MCM6        | 3.083   | 108  | RPA1        | 1.698   | 158  | PPP1CC      | 1.020   |
| 9    | AURKB       | 12.728  | 59   | CENPN       | 3.048   | 109  | CENPT       | 1.646   | 159  | MAD1L1      | 0.989   |
| 10   | CDC6        | 12.029  | 60   | PPP2R5A     | 2.991   | 110  | PSMB7       | 1.645   | 160  | PPP2R5D     | 0.896   |
| 11   | BIRC5       | 9.943   | 61   | INCENP      | 2.967   | 111  | PSMD12      | 1.644   | 161  | PSMD3       | 0.885   |
| 12   | GINS2       | 9.823   | 62   | MCM7        | 2.926   | 112  | PSMD1       | 1.634   | 162  | PSMB4       | 0.880   |
| 13   | SKA1        | 9.493   | 63   | POLD3       | 2.837   | 113  | PSMA2       | 1.616   | 163  | MAPRE1      | 0.868   |
| 14   | NDC80       | 9.282   | 64   | CASC5       | 2.796   | 114  | PAFAH1B1    | 1.608   | 164  | PSMB10      | 0.844   |
| 15   | CENPM       | 8.938   | 65   | PSMA1       | 2.785   | 115  | PSMD6       | 1.595   | 165  | KIF2A       | 0.822   |
| 16   | ERCC6L      | 8.639   | 66   | KIF20A      | 2.776   | 116  | POLD2       | 1.564   | 166  | KNTC1       | 0.814   |
| 17   | PSMD9       | 8.307   | 67   | RAD21       | 2.735   | 117  | PSMA7       | 1.533   | 167  | E2F3        | 0.773   |
| 18   | NUF2        | 7.717   | 68   | DNA2        | 2.724   | 118  | RFC4        | 1.528   | 168  | PSMD5       | 0.768   |
| 19   | CDC45       | 7.440   | 69   | LIG1        | 2.710   | 119  | POLA2       | 1.519   | 169  | STAG2       | 0.766   |
| 20   | KIF2C       | 7.041   | 70   | CENPP       | 2.706   | 120  | CLIP1       | 1.509   | 170  | POLD4       | 0.695   |
| 21   | NUDC        | 7.037   | 71   | SKA2        | 2.696   | 121  | PSME2       | 1.509   | 171  | SEH1L       | 0.626   |
| 22   | PRIM1       | 6.714   | 72   | SPC24       | 2.657   | 122  | POLE2       | 1.489   | 172  | PSMB2       | 0.624   |
| 23   | ZWINT       | 6.504   | 73   | PPP2CB      | 2.635   | 123  | PSMB1       | 1.467   | 173  | PSMC6       | 0.610   |
| 24   | CDCA8       | 6.473   | 74   | MAD2L1      | 2.634   | 124  | UBA52       | 1.466   | 174  | RFC5        | 0.548   |
| 25   | CENPK       | 6.246   | 75   | FBXO5       | 2.612   | 125  | CCNA2       | 1.461   | 175  | PSME4       | 0.533   |
| 26   | MLF1IP      | 5.954   | 76   | CDKN1A      | 2.611   | 126  | PSMB5       | 1.451   | 176  | RCC2        | 0.502   |
| 27   | ZWILCH      | 5.924   | 77   | RPA3        | 2.554   | 127  | ORC4        | 1.405   | 177  | CKAP5       | 0.496   |
| 28   | KIF18A      | 5.346   | 78   | CCNA1       | 2.552   | 128  | PSMD14      | 1.402   | 178  | NDEL1       | 0.472   |
| 29   | GINS1       | 5.281   | 79   | CENPO       | 2.513   | 129  | PSMD8       | 1.377   | 179  | CLASP1      | 0.438   |
| 30   | FEN1        | 5.251   | 80   | DSN1        | 2.460   | 130  | ORC3        | 1.366   | 180  | RANGAP1     | 0.436   |
| 31   | E2F1        | 4.845   | 81   | MCM3        | 2.456   | 131  | PSMB8       | 1.352   | 181  | CENPC1      | 0.417   |
| 32   | GORASP1     | 4.819   | 82   | NUP85       | 2.418   | 132  | PSMD13      | 1.344   | 182  | B9D2        | 0.320   |
| 33   | CENPA       | 4.714   | 83   | PSMF1       | 2.379   | 133  | PSMD2       | 1.336   | 183  | PSMC1       | 0.121   |
| 34   | PLK1        | 4.472   | 84   | DBF4        | 2.332   | 134  | MIS12       | 1.320   | 184  | RPS27       | 0.020   |
| 35   | SGOL2       | 4.429   | 85   | MCM8        | 2.249   | 135  | XPO1        | 1.316   |      |             |         |
| 36   | BUB1        | 4.375   | 86   | POLE        | 2.223   | 136  | PSMD4       | 1.282   |      |             |         |
| 37   | E2F2        | 4.169   | 87   | PSMC4       | 2.145   | 137  | GINS4       | 1.275   |      |             |         |
| 38   | ITGB3BP     | 4.135   | 88   | SEC13       | 2.123   | 138  | NUP107      | 1.271   |      |             |         |
| 39   | TAOK1       | 3.893   | 89   | MCM2        | 2.109   | 139  | CENPH       | 1.269   |      |             |         |
| 40   | PCNA        | 3.872   | 90   | STAG1       | 1.914   | 140  | PSMA6       | 1.253   |      |             |         |
| 41   | ORC6        | 3.823   | 91   | PSMA8       | 1.895   | 141  | ORC5        | 1.211   |      |             |         |
| 42   | SMC3        | 3.778   | 92   | PPP2R1A     | 1.836   | 142  | ZW10        | 1.187   |      |             |         |
| 43   | MCM5        | 3.717   | 93   | NUP133      | 1.833   | 143  | PRIM2       | 1.182   |      |             |         |
| 44   | CENPQ       | 3.709   | 94   | SMC1A       | 1.804   | 144  | PSMB9       | 1.167   |      |             |         |
| 45   | SGOL1       | 3.628   | 95   | PSMC5       | 1.799   | 145  | PSMB6       | 1.157   |      |             |         |
| 46   | RFC3        | 3.606   | 96   | PPP2R5E     | 1.790   | 146  | NUP43       | 1.156   |      |             |         |
| 47   | CDC7        | 3.542   | 97   | ORC2        | 1.776   | 147  | POLA1       | 1.147   |      |             |         |
| 48   | KIF23       | 3.485   | 98   | PSMD10      | 1.773   | 148  | PSMD7       | 1.138   |      |             |         |
| 49   | APITD1      | 3.353   | 99   | NUP37       | 1.771   | 149  | RB1         | 1.131   |      |             |         |
| 50   | BUB1B       | 3.351   | 100  | BUB3        | 1.767   | 150  | AHCTF1      | 1.129   |      |             |         |
